1 **Systematic analysis of SARS-CoV-2 infection of an ACE2-negative human airway**  
2 **cell**

3 Maritza Puray-Chavez<sup>1,#</sup>, Kyle M. LaPak<sup>2,#</sup>, Travis P. Schrank<sup>3,4</sup>, Jennifer L. Elliott<sup>1</sup>,  
4 Dhaval P. Bhatt<sup>2</sup>, Megan J. Agajanian<sup>5</sup>, Ria Jasuja<sup>2</sup>, Dana Q. Lawson<sup>1</sup>, Keanu Davis<sup>1</sup>,  
5 Paul W. Rothlauf<sup>1,6</sup>, Heejoon Jo<sup>7</sup>, Nakyung Lee<sup>1</sup>, Kasyap Tenneti<sup>1</sup>, Jenna E. Eschbach<sup>1</sup>,  
6 Christian Shema Mugisha<sup>1</sup>, Hung R. Vuong<sup>1</sup>, Adam L. Bailey<sup>8</sup>, D. Neil Hayes<sup>7</sup>, Sean P.J.  
7 Whelan<sup>1</sup>, Amjad Horani<sup>2,9</sup>, Steven L. Brody<sup>10</sup>, Dennis Goldfarb<sup>2,11</sup>, M. Ben Major<sup>2,12,\*</sup>, and  
8 Sebla B. Kutluay<sup>1,13,\*</sup>

9 <sup>1</sup>Department of Molecular Microbiology, Washington University in St. Louis, St. Louis, MO, USA

10 <sup>2</sup>Department of Cell Biology and Physiology, Washington University in St. Louis, St. Louis, MO,  
11 USA

12 <sup>3</sup>Lineberger Comprehensive Cancer Center, University of North Carolina at Chapel Hill School of  
13 Medicine, Chapel Hill, NC, USA.

14 <sup>4</sup>Department of Otolaryngology/Head and Neck Surgery, University of North Carolina at Chapel  
15 Hill School of Medicine, Chapel Hill, NC, USA.

16 <sup>5</sup>Department of Pharmacology, University of North Carolina at Chapel Hill, Chapel Hill, NC, USA

17 <sup>6</sup>Program in Virology, Harvard Medical School, Boston, MA, USA.

18 <sup>7</sup>University of Tennessee Health Science Center for Cancer Research, Department of Medicine,  
19 Division of Hematology and Oncology, University of Tennessee, Memphis, TN, USA.

20 <sup>8</sup>Department of Pathology & Immunology, Washington University School of Medicine, St. Louis,  
21 MO, USA.

22 <sup>9</sup>Department of Pediatrics, Washington University in St. Louis, St. Louis, MO, USA

23 <sup>10</sup>Division of Pulmonary and Critical Care Medicine, Department of Medicine, Washington  
24 University in St Louis, St Louis, Mo.

25 <sup>11</sup>Institute for Informatics, Washington University in St. Louis, St. Louis, MO, USA.

26 <sup>12</sup>Department of Otolaryngology, Washington University in St. Louis, St. Louis, MO, USA

27 <sup>13</sup>Lead Contact

28 #Authors contributed equally

29 \*Correspondence: [kutluay@wustl.edu](mailto:kutluay@wustl.edu) (S.K.), [bmajor@wustl.edu](mailto:bmajor@wustl.edu) (M.B.M)

30

31

32

33

34

35

36

37 **ABSTRACT**

38 Established *in vitro* models for SARS-CoV-2 infection are limited and include cell lines of  
39 non-human origin and those engineered to overexpress ACE2, the cognate host cell  
40 receptor. We identified human H522 lung adenocarcinoma cells as naturally permissive  
41 to SARS-CoV-2 infection despite complete absence of ACE2. Infection of H522 cells  
42 required the SARS-CoV-2 spike protein, though in contrast to ACE2-dependent models,  
43 spike alone was not sufficient for H522 infection. Temporally resolved transcriptomic and  
44 proteomic profiling revealed alterations in cell cycle and the antiviral host cell response,  
45 including MDA5-dependent activation of type-I interferon signaling. Focused chemical  
46 screens point to important roles for clathrin-mediated endocytosis and endosomal  
47 cathepsins in SARS-CoV-2 infection of H522 cells. These findings imply the utilization of  
48 an alternative SARS-CoV-2 host cell receptor which may impact tropism of SARS-CoV-2  
49 and consequently human disease pathogenesis.

50

51 **KEY WORDS**

52 SARS-CoV-2, COVID-19, ACE2-independent, alternative receptor, type I interferon,  
53 nucleic acid sensing, RIG-I-like receptors, virus-host interactions, proteomics, clathrin-  
54 mediated endocytosis

55

## 56 INTRODUCTION

57 Severe acute respiratory syndrome coronavirus 2 (SARS-CoV-2) emerged in late 2019  
58 as the causative agent of the ongoing Coronavirus Disease-2019 (COVID-19) pandemic  
59 (Wu et al., 2020; Zhou et al., 2020). SARS-CoV-2 is a  $\beta$ -coronavirus and belongs to the  
60 larger group of coronaviruses (CoV) characterized by single-stranded, positive-sense  
61 RNA genomes of unusually large size (27-32 kb). Severe COVID-19 is marked by virus-  
62 induced lung damage (Wu and McGoogan, 2020), elevated levels of pro-inflammatory  
63 cytokines, immune cell infiltration in the lung (Chen et al., 2020; Huang et al., 2020) and  
64 multi-system involvement (Varga et al., 2020). The emergence of new SARS-CoV-2  
65 variants bearing mutations in the viral spike (S) protein and recent reports of alternative  
66 viral entry mechanisms (Cantuti-Castelvetri et al., 2020; Clausen et al., 2020; Daly et al.,  
67 2020; Wang et al., 2021) demands comprehensive understanding of viral entry,  
68 replication and the host cell response. This knowledge will empower new therapeutics  
69 and vaccines to thwart future viral outbreaks.

70 SARS-CoV-2 homotrimeric viral S protein binding to the host cell angiotensin-converting  
71 enzyme 2 (ACE2) receptor mediates viral entry (Hoffmann et al., 2020; Letko et al.,  
72 2020; Walls et al., 2020; Zhou et al., 2020). High-sensitivity RNA *in situ* mapping  
73 revealed the presence of ACE2 throughout the respiratory tract with highest expression  
74 in the nasal epithelium and gradually decreasing expression throughout the lower  
75 respiratory tract (Hou et al., 2020). Though present, ACE2 expression is relatively low in  
76 the respiratory tract (Aguiar et al., 2020; Hikmet et al., 2020) compared with higher levels  
77 in the gastrointestinal tract, kidney and myocardium (Hamming et al., 2004; Qi et al.,  
78 2020; Sungnak et al., 2020; To and Lo, 2004; Zhao et al., 2020; Zou et al., 2020). Low  
79 levels of ACE2 expression may be compensated by additional attachment/entry factors  
80 that enhance viral entry. For example, recent studies revealed that neuropilin-1 (NRP1)

81 and heparan sulfate can facilitate ACE2-dependent SARS-CoV-2 entry *in vitro* (Cantuti-  
82 Castelvetri et al., 2020; Clausen et al., 2020; Daly et al., 2020). Additionally, the tyrosine-  
83 protein kinase receptor AXL mediates SARS-CoV-2 S pseudotyped lentivirus entry in an  
84 ACE2-independent manner, though the impact of AXL on the entry and the replication of  
85 fully infectious SARS-CoV-2 entry was significantly lower (Wang et al., 2021).

86 Multiple cell lines are routinely used to study  $\beta$ -coronavirus infection. SARS-CoV-2  
87 primarily infects ciliated and type 2 pneumocyte cells in the human lung (Schaefer et al.,  
88 2020). As such, differentiated primary airway epithelial cells likely represent the most  
89 physiologically relevant model to study SARS-CoV-2 infection in culture. However, these  
90 cells require culture at an air-liquid interface, complex media formulations, and weeks of  
91 differentiation. Genetic manipulation, culture scalability, and donor-to-donor variability  
92 further complicate their use. Vero cells are derived from African green monkey kidney  
93 and are commonly used to propagate and study SARS-CoV-2 (Cagno, 2020; Chu et al.,  
94 2020b). The exceptional permissiveness of Vero cells is likely due to an ablated type I  
95 interferon response (IFN) due to a large deletion in the type I IFN gene cluster  
96 (Desmyter et al., 1968; Diaz et al., 1988; Osada et al., 2014). The inactivation of the type  
97 I IFN response and the presence of species-specific responses to viral pathogens (Long  
98 et al., 2019; Malim and Bieniasz, 2012; Rothenburg and Brennan, 2020) limits the utility  
99 and physiological relevance of Vero cell infection experiments. Although human Caco-2  
100 colorectal adenocarcinoma and Huh-7 hepatocellular carcinoma cell lines support  
101 SARS-CoV-2 replication in an ACE2-dependent manner (Chu et al., 2020b; Kim et al.,  
102 2020; Ou et al., 2020), the only human lung cell line reported to be permissive to SARS-  
103 CoV-2 replication is Calu-3, albeit with significantly lower replication compared to Vero  
104 cells (Chu et al., 2020b; Ou et al., 2020). The general lack of permissiveness to SARS-  
105 CoV-2 infection in lung-derived cell lines is rescued by ectopic overexpression of the

106 ACE2 receptor, suggesting that viral entry constitutes a major block to virus replication  
107 (Blanco-Melo et al., 2020).

108 In addition to ACE2 expression, cellular tropism of SARS-CoV-2 may be determined by  
109 cell intrinsic and innate immune defenses. Recognition of viral replication intermediates,  
110 typically viral nucleic acids, by toll-like receptors (TLRs) and RIG-I-like receptors (RLRs)  
111 culminate in secretion of type I and type III IFNs (Lazear et al., 2019; Schoggins, 2018).  
112 Type I/III IFN signaling results in the upregulation of numerous interferon-stimulated  
113 genes (ISGs) which collectively establish an antiviral state. SARS-CoV-2 induces lower  
114 levels of type I/III IFNs *in vitro* compared with other respiratory pathogens (Blanco-Melo  
115 et al., 2020; Chu et al., 2020a; Stukalov et al., 2020), possibly due to the expression of  
116 the SARS-CoV-2 proteins Nsp1 and ORF6 (Xia et al., 2020). Type I IFN pretreatment of  
117 cell culture models potently suppresses SARS-CoV-2 replication (Lokugamage et al.,  
118 2020; Xie et al., 2020), suggesting a potentially important role of this pathway in defining  
119 cellular tropism.

120 To identify new lung and upper airway cell culture models that are naturally permissive  
121 to SARS-CoV-2 infection, we infected a panel of human lung and head/neck cancer cell  
122 lines expressing varying levels of ACE2 and the TMPRSS2 protease. Unexpectedly, we  
123 found that the H522 lung adenocarcinoma cell line, which does not express any  
124 detectable levels of ACE2 or TMPRSS2, supports efficient SARS-CoV-2 replication.  
125 Infection of H522 cells is independent of ACE2, requires the viral S protein, and is  
126 suppressed by impeding clathrin-mediated endocytosis (CME) or endosomal cathepsin  
127 function. Time-resolved transcriptomic and proteomic profiling of infected H522 cells  
128 identified a robust activation of type I IFN responses in a MDA5-dependent manner,  
129 activation of CME, and modulation of cell cycle associated genes and pathways.  
130 Chemical inhibition of the AAK1 kinase, which potentiates CME, suppressed SARS-

131 CoV-2 infection of H522 cells as well as primary human airway cultures. The ACE2 and  
132 TMPRSS2-independent infection of H522 cells establishes the presence of an  
133 alternative entry pathway for SARS-CoV-2 in human airway cells. Comprehensive  
134 understanding of these entry mechanisms may better explain the complex Covid-19  
135 disease pathogenesis and the design of new and effective therapies.

## 136 **RESULTS**

### 137 **H522 human lung adenocarcinoma cell line is permissive to SARS-CoV-2 infection**

138 To identify additional cell types to model SARS-CoV-2 infection, we performed RNA-seq  
139 analysis on a panel of 10 lung and head/neck cancer cell lines, revealing varied  
140 expression levels of *ACE2* and *TMPRSS2* as well as other entry factors including  
141 proteases involved in S cleavage (*FURIN*, *CTSB*, *CTSL*) and neuropilin-1 (*NRP1*)  
142 (Cantuti-Castelvetri et al., 2020; Daly et al., 2020) (**Fig. 1A, Fig. S1 and Table S1**).  
143 Normalized RNA-seq read counts for established SARS-CoV-2 cell models Caco-2,  
144 Calu-3 and Vero E6 enabled comparative analysis (**Fig. 1A, Fig. S1 and Table S1**).  
145 Validation by qRT-PCR and protein quantification by immunoblotting showed ACE2  
146 protein levels ranging from undetected to 2-3-fold lower than Vero E6 cells, currently the  
147 most permissive cell model to SARS-CoV-2 infection (**Fig. 1B, C**). The observed cell  
148 line-dependent differences in ACE2 protein migration is possibly due to post-  
149 translational modifications, including glycosylation (**Fig. 1C**) (Shajahan et al., 2020;  
150 Walls et al., 2020; Wrapp et al., 2020; Yang et al., 2020). Each cell line was then  
151 infected with SARS-CoV-2 before quantification of cell-associated viral RNA at 4- and  
152 72-hours post infection (hpi) (**Fig. 1D**). The majority of cell lines, including those that  
153 express ACE2 and TMPRSS2 at relatively high levels (i.e. Detroit562 and H596) were  
154 not permissive to SARS-CoV-2 replication (**Fig. 1D**). H522 and to a lesser degree

155 HCC827 cells supported virus replication (**Fig. 1D**). Surprisingly, neither ACE2 nor  
156 TMPRSS2 were detected in H522 cells (**Fig. 1A-D**).

157 Given the possibility of ACE2-independent infection, we focused our efforts on H522  
158 cells. To define viral replication kinetics, H522 cells were infected at various multiplicities  
159 of infection (MOIs) before monitoring for virus growth over 4 days. Cell-associated viral  
160 RNA levels increased substantially (3-4 logs) within 24 hours of infection in a MOI-  
161 responsive manner (**Fig. 1E**) and corresponded to heightened viral RNA in the cell  
162 culture supernatants (**Fig. 1F**). We confirmed replication competency of virus released  
163 from H522 cells through plaque assays on Vero cells (up to  $2.2 \times 10^5$  pfu/mL, data not  
164 shown). While permissive, infection progressed slower in H522 cells compared to Vero  
165 E6 cells and higher doses of the virus were required to achieve similar numbers of  
166 infected cells (**Fig. 1G**). Viruses formed plaques on H522 cells and plaque sizes were  
167 comparable to those obtained on Vero E6 cells, albeit the effective MOI was ~20-fold  
168 lower (**Fig. 1H**).

169 Quantified RNA-*in situ* hybridization (ISH) revealed the kinetics of SARS-CoV-2 viral  
170 replication and spread in H522 cells (**Fig. 1I, S2A, B**). Incoming virions were readily  
171 detected at 4 hpi by RNA-ISH in cells infected with a MOI of 1 (white arrows to green  
172 puncta; **Fig. 1I**). Expectedly, both the number of cells positive for viral RNA and the  
173 number of viral RNA puncta/cell were MOI-dependent (**Fig. S2A, B**). We tracked viral  
174 spread over time and observed increased staining for both viral RNA and N, and  
175 increased number of infected cells per field (**Fig. S2A**). Furthermore, similar to Vero  
176 cells, virions were observed in membrane-limited compartments in infected H522 cells,  
177 and frequently in apoptotic cells (**Fig. 1J**). These results show that H522 cells are  
178 productively infected with SARS-CoV-2 despite lacking any detectable levels of  
179 ACE2/TMPRSS2 expression.

180 **SARS-CoV-2 spike (S) protein is necessary but not sufficient for H522 infection**

181 SARS-CoV-2 entry into host cells requires viral S-mediated engagement of the ACE2  
182 receptor and priming of S by the TMPRSS2 or other host cell proteases (Hoffmann et al.,  
183 2020; Letko et al., 2020; Walls et al., 2020; Zhou et al., 2020). Given that ACE2 and  
184 TMPRSS2 mRNA and protein were undetectable in H522 cells (**Fig. 1A-C**), we tested  
185 the dependency on S for SARS-CoV-2 infection. H522 parental cells, H522 cells stably  
186 expressing ACE2 (H522-ACE2) and Vero E6 cells were infected with SARS-CoV-2 in  
187 the presence of a S neutralizing antibody (Alsoussi et al., 2020) or soluble human ACE2-  
188 Fc decoy receptor (**Fig. 2A-C**) (Case et al., 2020). In both experiments, blockage of S  
189 significantly diminished the amount of cell-associated viral RNA in H522, H522-ACE2  
190 and Vero E6 cells (**Fig. 2B-C**). The decreased sensitivity of H522-ACE2 cells to  
191 treatment as compared to parental H522 cells likely reflects the high overexpression of  
192 ACE2 (**Fig. 2A**).

193 We next investigated whether S is sufficient for viral entry in H522 cells. For this, we  
194 used a replication-competent GFP-reporter vesicular stomatitis virus (VSV) that  
195 expresses a modified form of the SARS-CoV-2 S protein (designated VSV-GFP-SARS-  
196 CoV-2-S<sub>Δ21</sub>). The S protein present on the VSV particles is antigenically and functionally  
197 indistinguishable to the native S trimers in infectious SARS-CoV-2 (Case et al., 2020).  
198 We infected the following cell models with VSV-GFP-SARS-CoV-2-S<sub>Δ21</sub>: Vero E6, H522,  
199 H522-ACE2, primary basal human bronchial epithelial cells (HBECs) and HBECs  
200 engineered to express ACE2 (Basal HBEC-ACE2; **Fig. 2A**). While Vero E6, H522-ACE2  
201 and basal-HBEC-ACE2 cells were readily infected, H522 and basal cells were resistant  
202 to infection by VSV-GFP-SARS-CoV-2-S<sub>Δ21</sub> (**Fig. 2D**), suggesting that S protein is not  
203 sufficient for viral entry.



204 **SARS-CoV-2 replication in H522 cells is independent of ACE2**

205 Two orthogonal approaches were used to test whether ACE2 mediated SARS-CoV-2  
206 infection of H522 cells. First, cells were pre-treated with anti-ACE2 blocking antibody  
207 before addition of SARS-CoV-2. Anti-DC-SIGN and anti-GFP antibodies served as  
208 negative controls as well as the use of CHO-derived PgsA-745 cells, which are not  
209 permissive to infection (**Fig. 3A**). While the ACE2 blocking antibody significantly  
210 decreased the amount of cell-associated viral RNA in Calu-3 cells, it did not impact  
211 SARS-CoV-2 viral RNA levels in H522 cells (**Fig. 3A**). As expected, neither the anti-DC-  
212 SIGN nor the anti-GFP antibodies significantly affected viral RNA levels in H522 and  
213 Calu-3 cells, and virus replication remained at background levels in PgsA-745 cells.

214 In a second approach to test ACE2 involvement, we inactivated the ACE2 genetic locus  
215 by CRISPR gene editing in H522 and Calu-3 cells. Polyclonal cell populations containing  
216 CRISPR-edited loci were infected with SARS-CoV-2 and viral replication was monitored  
217 at 4 and 72 hpi (**Fig. 3B, S3A**). While viral RNA levels increased at similar levels in H522  
218 and H522 ACE2<sup>-/-</sup> cells, lack of ACE2 significantly reduced SARS-CoV-2 replication in  
219 Calu-3 cells (**Fig. 3B**). In agreement, the addition of an ACE2 blocking antibody did not  
220 impair virus replication in H522 or H522 ACE2<sup>-/-</sup> cells, but completely abolished  
221 replication in Calu-3 cells (**Fig. 3C**). We next isolated monoclonal populations of H522  
222 ACE2 WT (n=6), H522 ACE2<sup>-/-</sup> (n=2) and H522 ACE2<sup>+/-</sup> (n=1) cells to corroborate these  
223 findings (**Fig. S3B**). Sanger sequencing of the edited loci in two independent monoclonal  
224 populations revealed unique 5 bp deletions in Exon 3 of ACE2, resulting in the same  
225 truncated ACE2 protein lacking the C-terminal 672 amino acids, which includes the  
226 intracellular domain, transmembrane domain, collectrin domain and 75% of  
227 carboxypeptidase domain (**Fig. S3B**). SARS-CoV-2 infection of monoclonal cell lines  
228 from H522 control and H522 ACE2 KO resulted in similar levels of infection (**Fig. 3D**).

229 Taken together, these data establish that H522 cells are permissive to SARS-CoV-2  
230 infection independent of ACE2 but dependent on the SARS-CoV-2 S protein.

### 231 **Clathrin-mediated endocytosis governs SARS-CoV-2 infection of H522 cells**

232 To begin to decipher the mechanism(s) of SARS-CoV-2 entry into H522 cells, we  
233 performed infections in the presence of compounds that interfere with SARS-CoV-2  
234 entry, including camostat mesylate (TMPRSS2 inhibitor) (Hoffmann et al., 2020; Shang  
235 et al., 2020; Shema Mugisha et al., 2020a), E64D (broad spectrum inhibitor of  
236 proteases, including endosomal cathepsins) (Ou et al., 2020; Shema Mugisha et al.,  
237 2020a), bafilomycin A (inhibitor of vATPase) (Ou et al., 2020; Shema Mugisha et al.,  
238 2020a) and apilimod (inhibitor of PIKfyve) (Kang et al., 2020; Ou et al., 2020; Shema  
239 Mugisha et al., 2020a). We additionally included a specific inhibitor of AAK1 kinase  
240 (SGC-AAK1-1); AAK1 promotes CME through phosphorylation of the AP2M1 subunit of  
241 the AP2 complex (Agajanian et al., 2019; Conner and Schmid, 2002, 2003). E64D,  
242 bafilomycin A, SGC-AAK1-1 and apilimod significantly reduced cell-associated viral  
243 RNAs in a dose-dependent manner, whereas camostat mesylate increased viral RNA  
244 levels (**Fig. 4A**). These findings were corroborated in comparative analysis of H522,  
245 Vero E6 and H522-ACE2 cells. Bafilomycin A significantly decreased cell-associated  
246 viral RNA levels in H522 and H522-ACE2 cells but did not affect viral entry in Vero E6  
247 cells (**Fig. S4**). Inhibition of both AAK1 and endosomal cathepsins B/L significantly  
248 decreased viral RNA levels in H522 cells but did not impact ACE2-dependent replication  
249 at appreciable levels in Vero E6 and H522-ACE2 cells at this concentration (**Fig. S4**).  
250 While apilimod decreased viral entry in Vero E6 cells, the effect was modest in H522  
251 cells and trended towards significance ( $p=0.07$ ; **Fig. S4**). Finally, camostat mesylate did  
252 not decrease, and on the contrary, increased the amount of cell-associated viral RNA in  
253 H522s, highlighting the TMPRSS2 independence of viral entry (**Fig. S4**).

254 Western blot analysis of H522 cells infected with SARS-CoV-2 revealed transient  
255 induction of AP2M1 phosphorylation 12-24 hpi, further supporting the involvement of  
256 CME in H522 viral infections (**Fig. 4B**). AAK1 inhibitors are highly specific and have  
257 been considered to be viable therapeutic options for treatment of SARS-CoV-2  
258 (Richardson et al., 2020). Consistent with our observations in H522 cells, inhibition of  
259 AAK1 kinase activity in differentiated primary HBECs grown at air-liquid interface led to a  
260 10-20-fold decrease in cell-associated SARS-CoV-2 RNA in a dose responsive manner  
261 (**Fig. 4C**). Together, these data support a role for CME and endosomal cathepsins in  
262 SARS-CoV-2 infections of H522 cells.

### 263 **SARS-CoV-2-infected H522 cells demonstrate RNA-level upregulation of type I** 264 **interferon responses and modulation of cell cycle genes**

265 To determine how H522 cells respond to SARS-CoV-2 infection, we conducted RNA-seq  
266 on cells infected at high and low MOI and followed the infection over the course of 4  
267 days (**Fig. 5A**). As expected, SARS-CoV-2 mRNA levels increased with time and MOI,  
268 plateauing around 24-48 hpi (**Fig. 5B**). At the peak of infection, 5-10% of total reads  
269 mapped to SARS-CoV-2 RNAs. Principal component analysis (PCA) showed samples  
270 separated well based on MOI and time post-infection (**Fig. 5C**). Analysis of differentially  
271 expressed genes (DEGs) at 96 hpi revealed MOI-dependent upregulation of IRF9, as  
272 well as numerous IFN-stimulated genes including ISG15, MX1, IFI35 and OAS3 (**Fig.**  
273 **5D, Table S2**). Hierarchical consensus clustering of the 2,631 DEGs ( $|\log_{2}FC| > 2$  and  
274  $q < 0.005$ ) generated 7 temporally resolved clusters (**Fig. 5E, F**). Over-representation  
275 analysis of each cluster revealed an initial sharp increase of cell cycle regulatory and  
276 inflammatory genes followed by decreasing levels as the infection proceeded (cluster 1)  
277 (**Fig. 5F, G, Table S3**). Additionally, IFN-alpha/beta signaling and downstream ISGs  
278 significantly increased as early as 48 hpi and continued to increase further by 96 hpi,

279 consistent with high levels of SARS-CoV-2 infection (cluster 4; **Fig 5E-G, Table S3**).  
280 Modulation of the cell cycle and sustained IFN signaling throughout infection were  
281 confirmed by gene set enrichment analysis (GSEA) of genes at each time point (**Fig. 5H,**  
282 **Table S3**). Together, these findings highlight global changes in the H522 transcriptome  
283 in response to SARS-CoV-2 and marked induction of antiviral immune responses.

#### 284 **SARS-CoV-2-induced proteome changes in H522 cells reveal induction of type I** 285 **IFN, cell cycle and DNA replication pathways**

286 To define the impact of SARS-CoV-2 infection on the H522 proteome, we conducted  
287 whole cell quantitative proteomics experiments over the course of 4 days (**Fig. 6A**).  
288 Biological triplicates for each time point were processed and the abundance of 7,469  
289 proteins was analyzed across samples. PCA highlights the high level of reproducibility  
290 and clustering of samples by infection and time post-infection (**Fig. 6B**). Similar to viral  
291 RNAs, abundance of viral proteins increased substantially within the first 24 hours of  
292 infection and plateaued thereafter (**Fig. 6C**). At 96hpi vs 96h mock, 492 differentially  
293 regulated proteins were identified (**Fig. 6D**). Unsupervised clustering defined seven  
294 unique clusters that characterize the temporal regulation of the H522 proteome (**Fig. 6E,**  
295 **Table S4**). Overall, the majority of the differentially expressed proteins increased  
296 following SARS-CoV-2 infection, with proteins in cluster 4 displaying the greatest fold  
297 changes (**Fig. 6F, Table S4**). Over-representation analysis revealed that cluster 4  
298 proteins include those involved in the IFN- $\alpha$  and IFN- $\gamma$  responses, which were the most  
299 significantly altered pathways (**Fig. 6G, Table S5**). Of note, all viral proteins were  
300 present in Cluster 2 and their accumulation preceded the induction of type I/III IFNs (**Fig.**  
301 **6E**). Cell cycle regulators were increased at early time points but declined thereafter,  
302 matching what was seen at the RNA level with a 12-24 hour delay (Cluster 1; **Fig.6 E-**  
303 **G**). Clusters 2 and 3 included proteins similarly involved in cell cycle regulation, DNA

304 replication/repair, and microtubule organization but tended to remain upregulated during  
305 SARS-CoV-2 infection (**Fig. 6E-G**). Finally, clusters 6 and 7 included proteins that were  
306 downregulated and included plasma membrane proteins such as Semaphorins  
307 (SEMA3A, C, D), APOE, ERBB4, LRP1, and SLIT2 with potential roles in viral entry  
308 pathways (**Fig. 6E-G**). We next looked for genes that correlated between our  
309 transcriptomic and proteomic datasets. While we see an even distribution of correlations  
310 when including all genes, there is an increase in correlated genes when focusing on only  
311 the differently expressed proteins (**Fig. 6H**). Among these genes, only the IFN- $\alpha$  and  
312 IFN- $\gamma$  signaling pathways were identified by GSEA for enrichment in correlation, further  
313 supporting an IFN response in H522 cells to SARS-CoV-2 infection (**Fig. 6I**).

314 To further illuminate pathways altered by SARS-CoV-2 infection, we mined the CORUM  
315 database for protein complexes consisting mostly of differentially expressed proteins  
316 (**Fig. 6J, S5**). In total, 27 complexes were found and involved IFN signaling, cell  
317 cycle/DNA replication, DNA repair, epigenetic modification, and protein  
318 folding/ubiquitination, (**Fig. 6J-K, S5**). Over half of the complexes had functions in cell  
319 cycle and DNA repair (n=18). Of note, the viral proteins N and Nsp1 were previously  
320 reported to interact with components of the DNA polymerase alpha-primase complex,  
321 suggesting that the observed protein level changes are a direct result of these  
322 interactions (**Fig. 6J**). Additionally, we generated protein interactions networks based on  
323 BioGRID Multi-Validated Datasets for the 492 differentially expressed proteins in H522  
324 cells and the SARS-CoV-2 viral proteome (**Fig. 6K**). A network emerged that contained  
325 53 proteins involved in IFN signaling and downstream ISGs (**Fig. 6K**). Seven viral  
326 proteins associate with various host proteins within this network, raising the possibility  
327 that SARS-CoV-2 may directly modulate the IFN response in H522 cells (**Fig. 6K**).  
328 Taken together, these results show that SARS-CoV-2 infection of H522 cells leads to

329 significant upregulation of several genes involved in innate immune pathways and cell  
330 cycle regulation at both the mRNA and protein level.

### 331 **MDA5 mediates the sensing of SARS-CoV-2 replication intermediates**

332 Transcriptional profiling and proteomics revealed the IFN signaling pathway as the major  
333 immune signaling pathway responding to SARS-CoV-2 infection in H522 cells (**Fig. 5**  
334 **and 6**). To validate the IFN response, we measured the levels and activation of STAT1  
335 and downstream ISGs in infected H522 cells. We found that SARS-CoV-2 replication  
336 induced both upregulation of STAT1 expression and its phosphorylation, as well as  
337 downstream ISGs MX1 and IFIT1 by 48 hpi (**Fig. 7A**). MX1 and IFIT1 were upregulated  
338 further as the infection progressed at 72 and 96 hpi (**Fig. 7A**). Upregulation of the type I  
339 IFN response was delayed relative to the accumulation of viral N protein expression  
340 which peaked by 24 hpi, possibly due to antagonism of host responses at early times in  
341 infection.

342 We next sought to define the mechanism by which H522 cells sense and respond to  
343 SARS-CoV-2 replication. Components of TLR and RLR-dependent sensing pathways  
344 were knocked down by siRNA transfection and upregulation of ISGs assessed following  
345 SARS-CoV-2 infection. Most targets remained efficiently knocked down up to 120 hours  
346 post transfection (**Fig. S6**). The low knockdown efficiency of TLR3, TLR7, TLR8 and  
347 TLR9 is most likely due to their low to undetectable basal expression levels (**Fig S6**). In  
348 line with RNA-seq and proteomics findings, ISG15, IFIT1, IFIT2 and MX1 were  
349 upregulated upon infection in mock- and non-targeting (NT) siRNA-transfected H522  
350 cells (**Fig. 7B**). Depletion of MDA5 and, to a lesser extent, the downstream adaptor  
351 MAVS significantly reduced ISG induction in response to SARS-CoV-2 infection (**Fig.**  
352 **7C**). Knockdown of all the other targets had little or no impact on ISG upregulation (**Fig.**

353 **7C)**. Despite the decreased IFN response in MDA5 and MAVS depleted H522 cells,  
354 SARS-CoV-2 viral RNA levels remained at similar levels compared to controls (**Fig. 7D**).  
355 These results together suggest that viral RNAs are sensed by components of the RLR  
356 pathway in H522s resulting in activation of the type I IFN response.

## 357 **DISCUSSION**

358 Our screen of human lung and head/neck cancer cell lines that express varying levels of  
359 ACE2 and TMPRSS2 identified the H522 human lung adenocarcinoma cell line as being  
360 naturally permissive to SARS-CoV-2 infection despite no evidence of ACE2 and  
361 TMPRSS2 expression. Using CRISPR editing and neutralizing antibodies, we confirmed  
362 the ACE2 independence of H522 infection, a paradigm shifting finding which suggests  
363 the utilization of an alternative receptor in a cell line of lung origin. As ACE2 expression  
364 is comparably low in the human respiratory system (Aguiar et al., 2020; Hikmet et al.,  
365 2020), other co-receptors and/or attachment factors have been suspected to enhance  
366 viral entry. Indeed, recent findings establish NRP1 and heparan sulfate as positive  
367 mediators of ACE2-dependent SARS-CoV-2 entry (Cantuti-Castelvetri et al., 2020;  
368 Clausen et al., 2020; Daly et al., 2020). Given their dependency on ACE2 expression, it  
369 is unlikely that these factors mediate ACE2-independent entry into H522 cells. In  
370 addition, coronaviruses can utilize a diverse array of glycoconjugates as attachment  
371 factors. For example, human coronaviruses OC43 (HCoV-OC43) and HKU1 (HCoV-  
372 HKU1) bind to 9-O-Ac-sialosides (Huang et al., 2015; Hulswit et al., 2019; Tortorici et al.,  
373 2019), and MERS-CoV (a  $\beta$ -coronavirus) as well as  $\alpha$ - and  $\gamma$ -coronaviruses bind to other  
374 sialoglycans distinct from 9-O-Ac-sialosides (Li et al., 2017; Liu et al., 2015; Park et al.,  
375 2019; Schultze et al., 1996; Vlasak et al., 1988; Wickramasinghe et al., 2011). Whether  
376 sialic acids serve as entry receptors and/or cell attachment factors for SARS-CoV-2 in  
377 H522 cells remains to be determined.

378 A recent report suggested that tyrosine-protein kinase receptor AXL mediates SARS-  
379 CoV-2 entry in an ACE2-independent manner (Wang et al., 2021). It is unlikely that AXL  
380 is the alternative receptor utilized by SARS-CoV-2 in H522 cells for the following  
381 reasons. First, we found that AXL expression was lower in H522s compared with the  
382 other cell lines in our panel (**Table S1**). Second, while AXL expression enhanced  
383 lentiviruses pseudotyped with SARS-CoV-2 S (Wang et al., 2021), H522 cells were  
384 resistant to chimeric VSV-SARS-CoV-2 S and lentiviruses pseudotyped with SARS-CoV-  
385 2 S (**Fig. 2D and data not shown**). Third, though AXL potently enhances SARS-CoV-2  
386 S pseudotyped lentivirus entry, its effect on fully infectious SARS-CoV-2 replication is  
387 lower.

388 Despite the possible utilization of an alternative receptor, SARS-CoV-2 entry into H522  
389 cells requires S. However, our data suggests that S is either insufficient or that the 21  
390 residue truncation of the cytoplasmic tail influences the ability of S to mediate infection of  
391 H522 cells, given the inability of the VSV-GFP-SARS-CoV-2-S<sub>Δ21</sub> to infect H522 cells.  
392 VSV is highly sensitive to type I IFNs and numerous ISGs have been documented to  
393 block VSV replication (Espert et al., 2003; Fensterl et al., 2012; Liu et al., 2012; Muller et  
394 al., 1994; Pavlovic et al., 1990; Rihn et al., 2019; Rubinstein et al., 1981; Zurcher et al.,  
395 1992). The ability of VSV-GFP-SARS-CoV-2-S<sub>Δ21</sub> to infect H522 cells upon ACE2  
396 expression argues against the possibility of intrinsic and IFN-induced innate immune  
397 factors targeting VSV in H522 cells. Whether the viral coat E and M proteins in SARS-  
398 CoV-2 functionally impact infection of H522 remains to be tested (Masters, 2006;  
399 Schoeman and Fielding, 2019), as it is plausible that the steric hindrance caused by  
400 blockage of S may have interfered with E/M-mediated entry.

401 Another important observation in our study is the inability of numerous lung and  
402 head/neck cancer cell lines to support SARS-CoV-2 replication, despite expressing



403 ACE2/TMPRSS2. The one exception was the HCC287 cells, which express  
404 ACE2/TMPRSS2 but were less permissive to infection compared to the H522 and Vero  
405 E6 cells. One possible explanation for the general lack of permissiveness of these cell  
406 lines to SARS-CoV-2 include the alternative glycosylation or other post translations  
407 modifications of ACE2 (**Fig. 1C**). Alternatively, presence or induction of antiviral  
408 mechanisms such as type I/III IFNs and ISGs may underlie the lack of SARS-CoV-2  
409 replication in these cells. These results collectively suggest that expression of  
410 ACE2/TMPRSS2 at endogenous levels is a poor predictor of permissiveness to SARS-  
411 CoV-2 infection.

412 While permissive, SARS-CoV-2 infection in H522 cells proceeded at a slower rate  
413 compared to the highly permissive Vero E6 cells. We posit that the lower susceptibility of  
414 H522 cells may be explained by the ability to mount a substantial type I IFNs response  
415 upon infection (**Fig. 5-7**) as compared to Vero E6 cells, which are unable to synthesize  
416 type I IFNs. This hypothesis is in line with previous studies demonstrating the potent  
417 inhibition of SARS-CoV-2 replication by type I IFN treatment *in vitro* (Lokugamage et al.,  
418 2020; Xie et al., 2020). Furthermore, similar to Calu-3 cells (Yin et al., 2021), we found  
419 clear involvement of MDA5 and MAVS in induction of the IFN response in H522 cells.  
420 Despite the marked activation of the type I IFN responses, virus spread in H522 cells  
421 suggests the effective antagonism of these antiviral responses, possibly through the  
422 actions of numerous viral proteins (Park and Iwasaki, 2020).

423 Several CoV proteins have well described functions in modulation of host gene  
424 expression post-transcriptionally (Huang et al., 2011; Kamitani et al., 2009; Kopecky-  
425 Bromberg et al., 2006; Lokugamage et al., 2012; Nakagawa et al., 2016; Narayanan et  
426 al., 2008; Xiao et al., 2008; Zhou et al., 2008). For example, SARS-CoV-2 Nsp1 is  
427 thought to block host mRNA translation through its direct binding to host ribosomes

428 (Schubert et al., 2020; Yuan et al., 2020), which may explain the general discordance of  
429 host responses between existing RNA-seq and proteomics studies in SARS-CoV-2  
430 infected cells (Blanco-Melo et al., 2020; Bojkova et al., 2020; Bouhaddou et al., 2020;  
431 Chu et al., 2020a; Mick et al., 2020; Stukalov et al., 2020). Similarly, we see a wide  
432 range of anti-correlated and correlated regulated genes from our transcriptomic and  
433 proteomic datasets (**Fig. 6H**), further supporting a role for SARS-CoV-2 in modulating  
434 the host cell translational response, possibly through the action of Nsp1.

435 Our data implicates CME in SARS-CoV-2 infection of H522 cells. Specific inhibition of a  
436 kinase directly involved in CME, AAK1, significantly reduced SARS-CoV-2 infection in  
437 H522 cells and patient-derived HBECs (**Fig. 4, S4**). Moreover, SARS-CoV-2 infection of  
438 H522 cells resulted in transient increase in phosphorylation of AP2M1, the downstream  
439 target of AAK1 kinase activity. Though inhibition of AAK1 and CME has been suggested  
440 for therapeutic treatment of Covid-19, their efficacy remains to be established.  
441 Interestingly, AAK1 inhibition preferentially blocked SARS-CoV-2 infection in H522 cells  
442 as compared to Vero E6 or Calu-3 cells (**Fig. S4**), suggesting the ACE2-independent  
443 entry mechanism in H522 cells relies on CME.

444 In line with published studies (Bouhaddou et al., 2020; Ochsner et al., 2020), our  
445 findings also indicate that SARS-CoV-2 may modulate DNA replication and cell cycle.  
446 However, our findings differ from these published studies in the following ways. First,  
447 instead of downmodulation of E2F targets (Ochsner et al., 2020), we find upregulation of  
448 E2F targets forming different temporal clusters (**Fig. 6E, F**). Second, in contrast to a  
449 phospho-proteomics study conducted in Vero E6 cells which only found activation of  
450 kinases involved in cell cycle regulation and DNA replication without any protein level  
451 changes (Bouhaddou et al., 2020), we find RNA and protein level upregulation of these  
452 gene sets including CCNB1, CCNE1, CHEK1, PLK1, AURKA and PKMYT1.

453 Notwithstanding, modulation of cell cycle upon SARS-CoV-2 is common to all of these  
454 studies, although the relevance for SARS-CoV-2 pathogenesis remains unclear.

455 Taken together, H522 cells provide an alternative *in vitro* model to study SARS-CoV-2  
456 infection and host innate immune responses. The independence of virus replication from  
457 ACE2/TMPRSS2 in these cells indicates the utilization of an alternative receptor and  
458 entry pathway which may have functional relevance in understanding disease  
459 pathogenesis *in vivo*. Characterization of these mechanisms may provide unique targets  
460 for therapeutic development and vaccine design. The inevitable emergence of novel  
461 coronaviruses utilizing variable entry pathways further underscores the importance of the  
462 H522 cell line model.

#### 463 **ACKNOWLEDGEMENTS**

464 This work was supported in part by a V Foundation grant (T2014-009) to M.B. Major and  
465 D. N. Hayes, a T32 training grant (T32CA009547-34) to K.L., the Dorothy R. and Hubert  
466 C. Moog Professor of Medicine to S.L.B, a K08HL150223 grant to A.H., NIH AI059371 to  
467 S.P.J.W. We thank the Alvin J. Siteman Cancer Center at Washington University School  
468 of Medicine and Barnes-Jewish Hospital in St. Louis, MO., for the use of the Siteman  
469 Flow Cytometry, which provided single cell sorting. The Siteman Cancer Center is  
470 supported in part by an NCI Cancer Center Support Grant #P30 CA091842. We thank  
471 Dr. Ali Ellebedy for providing the 2b04 neutralizing antibody and Dr. Daved Fremont for  
472 the soluble Fc-ACE2. We additionally thank members of the Whelan and Diamond labs  
473 for reagents.

#### 474 **AUTHOR CONTRIBUTIONS**

475 M. P-C., K.L., M.B.M. and S.B.K. conceptualized the study; M. P-C., K.L., M.B.M. and  
476 S.B.K. designed the methodology. M. P-C., K.L., J.L. E., D.B., M.J.A., D.Q.L., K.D., K.T.,  
477 J.E.E., C.S.M., H.R.V. and S.B.K performed the experiments. T.S., R.J., H.J., and D.G.  
478 performed all statistical and bioinformatics analysis with help from N.L. and K.T. P.W.R.  
479 and A.B. generated and provided key reagents. A.H. and S.L.B. generated and cultured  
480 primary basal epithelial cells. K.L., M.B.M. and S.B.K. wrote the manuscript with input  
481 from all the authors.

## 482 **DECLARATION OF INTERESTS**

483 S.P.J.W., P.W.R. and Washington University have filed a patent application for uses of  
484 VSV-SARS-CoV-2. S.P.J.W has received unrelated funding support in sponsored  
485 research agreements with Vir Biotechnology, Abbvie and SAB therapeutics.

486

## 487 **FIGURE LEGENDS**

488 **Figure 1. The H522 cell line is null for ACE2 expression and is permissive to**  
489 **SARS-CoV-2 infection. A,** Normalized RNA-seq reads were aligned to the GRCh38  
490 and Vervet-African green monkey genomes and quantified with Salmon (v1.3.0). The  
491 read counts for *ACE2*, *TMPRSS2*, *FURIN*, *CTSB*, *CTSL*, and *NRP1* are given for the  
492 indicated cell lines. See also Figure S1 and Table S1. **B,** qRT-PCR for *ACE2* and  
493 *TMPRSS2* expression normalized to 1 $\mu$ g input RNA for each cell line. *Cercopithecus*  
494 *aethiops* specific primers against *TMPRSS2* were used for the Vero E6 samples. Each  
495 bar represents mean, error bars indicate SEM (n=3). **C,** Immunoblot showing ACE2  
496 expression across 10 lung and upper airway cancer cell lines and Vero E6 cells  
497 (representative of n=3). ACE2 expression was quantified using Licor Image Studio  
498 software in which ACE2 levels were normalized to  $\beta$ -ACTIN, set relative to Vero E6, and

499 are indicated below the immunoblots. **D**, qRT-PCR for cell-associated SARS-CoV-2  
500 RNA at 4 and 72 hpi at MOI=0.015 or 0.15. MOIs were determined by titration on Vero  
501 E6 cells. Error bars represent SEM (n=3). \* indicates p<0.05 where significance was  
502 determined using two-way ANOVA and the Šidák correction for multiple comparisons. **E**,  
503 qRT-PCR for cell-associated SARS-CoV-2 RNA in H522 cells across various time points  
504 and MOIs. Error bars represent SEM (n=2). **F**, qRT-PCR for SARS-CoV-2 RNA in the  
505 supernatant of H522 cells across various time points and MOIs. Error bars represent  
506 SEM (n=2). **G**, Percent of SARS-CoV-2 infected H522 and Vero E6 cells determined by  
507 FACS for Nucleocapsid positive cells across various time points and MOIs. Error bars  
508 represent SEM (n=2). **H**, Plaque assays on H522 and Vero cells using two viral dilutions  
509 ( $10^{-2}$  and  $10^{-1}$ ). Data are representative of three independent experiments. **I**,  
510 Representative images of H522 cells infected with SARS-CoV-2 at MOI=1. H522 cells  
511 were fixed and stained for SARS-CoV-2 RNA (green) by RNAScope reagents and  
512 Nucleocapsid (N) protein (red) at 4 and 96hpi and imaged by confocal microscopy  
513 (representative of n=2). See also Figure S2. **J**, Representative images using  
514 transmission electron microscopy (TEM) on Vero E6 and H522 cells infected with SARS-  
515 CoV-2 (MOI=0.1 pfu/cell and 24 hpi for Vero, MOI: 1 pfu/cell and 96 hpi for H522).

516 **Figure 2. The SARS-CoV-2 S protein is necessary but not sufficient for viral entry**  
517 **in the H522 cell line.**

518 **A**, Representative immunoblot showing ACE2 expression and Vinculin as the loading  
519 control in Vero E6, H522, H522-ACE2, basal HBEC, and basal HBEC-ACE2 cells. **B**,  
520 Viruses were pre-treated with increasing concentrations of S neutralizing antibody for 1 h  
521 and then cells were infected with SARS-CoV-2 at MOI=0.1 in the presence of the S  
522 neutralizing antibody. Cell-associated SARS-CoV-2 RNA was detected by qRT-PCR at  
523 24 hpi and was normalized to mock treated (n=3). \*\*\* indicates p<0.001 where

524 significance was determined using two-way ANOVA and the Dunnett correction for  
525 multiple comparisons. **C**, SARS-CoV-2 viruses were pre-treated with increasing amounts  
526 of soluble ACE2-Fc for 1 h and then cells were infected with SARS-CoV-2 at MOI=0.1 in  
527 the presence of ACE2-Fc. Cell-associated SARS-CoV-2 RNA was detected by qRT-  
528 PCR at 24 hpi and was normalized to mock treated (n=3). \*\* indicates p<0.01 and \*\*\*  
529 indicates p<0.001 where significance was determined using two-way ANOVA and the  
530 Dunnett correction for multiple comparisons. **D**, Representative images of cells infected  
531 with VSV-SARS-CoV-2-S<sub>Δ21</sub> at 0 and 8hpi using an Incucyte® S3 Live Cell Analysis  
532 System (n=3). Percent GFP positive cells seeded in triplicate were quantified over time  
533 with the shaded grey region indicating standard deviation.

534 **Figure 3. The H522 cell line is permissive to SARS-CoV-2 infection independent of**  
535 **ACE2 expression.** **A**, Cells were pre-treated with 20 µg/ml of the indicated blocking  
536 antibodies for 1 h and then infected with SARS-CoV-2 at MOI=0.1 in the presence of the  
537 blocking antibodies. Cell-associated SARS-CoV-2 RNA was detected by qRT-PCR at 72  
538 hpi (n=3). \*\*\* indicates p<0.001 where significance was determined using two-way  
539 ANOVA and the Dunnett correction for multiple comparisons. **B**, Polyclonal populations  
540 of H522 and Calu-3 (ACE2<sup>+/+</sup> and ACE2<sup>-/-</sup>) cells were infected with SARS-CoV-2 virus  
541 and cell-associated SARS-CoV-2 RNA was detected by qRT-PCR 4 and 72 hpi (n=8).  
542 Error bars indicate the SEM. \*\*\* indicates p<0.001 where significance was determined  
543 using two-way ANOVA and the Tukey correction for multiple comparisons. See also  
544 Figure S3. **C**, Polyclonal populations of H522 and Calu-3 (ACE2<sup>+/+</sup> and ACE2<sup>-/-</sup>) cells  
545 were pre-treated with 20 µg/ml of the indicated blocking antibodies for 1 h and then  
546 infected with SARS-CoV-2 at MOI=0.1 in the presence of the blocking antibodies. Cell-  
547 associated SARS-CoV-2 RNA was detected by qRT-PCR 72 hpi (n=3). Error bars  
548 indicate the SEM. \*\*\* indicates p<0.001 where significance was determined using two-

549 way ANOVA and the Tukey correction for multiple comparisons. See also Figure S3. **D**,  
550 Monoclonal populations from H522 ACE2<sup>+/+</sup> (6 clones), ACE2<sup>-/-</sup> (2 clones), and ACE2<sup>+/-</sup>  
551 (1 clone) were infected with SARS-CoV-2 at MOI=0.1 and cell-associated SARS-CoV-2  
552 RNA was detected by qRT-PCR 4 and 72 hpi (n≥3). Error bars indicate the SEM. See  
553 also Figure S3.

554 **Figure 4. H522 infection by SARS-CoV-2 is dependent on clathrin-mediated**  
555 **endocytosis and endosomal cathepsins. A**, H522 cells were pre-treated with  
556 increasing concentrations of bafilomycin A, SGC-AAK1-1, E64D, apilimod, or camostat  
557 mesylate for 1 h and then infected with SARS-CoV-2 at MOI=1 in the presence of the  
558 inhibitors. Cell-associated SARS-CoV-2 RNA was detected by qRT-PCR 24 hpi and  
559 normalized to DMSO treated cells (n≥3). See also Figure S4. **B**, Immunoblot showing  
560 pAP2M1 (T156), AP2M1, and AAK1 levels in H522 cells infected with SARS-CoV-2 over  
561 time (representative of n=2). pAP2M1 (T156) levels were normalized to total AP2M1 and  
562 set relative to the 4 hours mock control. Quantification was performed using the Licor  
563 Image Studio software and values are indicated below the immunoblots. **C**, Basal  
564 HBECs from 5 different donors were pre-treated with increasing concentrations of SGC-  
565 AAK1-1 for 2 h and then infected with SARS-CoV-2 in the presence of the inhibitor. Cell-  
566 associated SARS-CoV-2 RNA was detected by qRT-PCR 72 hpi and normalized to  
567 DMSO treated cells.

568 **Figure 5. H522 transcriptome response to SARS-CoV-2 infection. A**, Experimental  
569 design of transcriptomics experiments. H522 cells were infected with SARS-CoV-2 at  
570 MOI 1.0, 0.25, 0.06, or 0.015 and harvested after 4, 24, 48, 72, and 96 h. Mock-infected  
571 cells were harvested after 4 h. All conditions were performed in duplicate. **B**, Relative  
572 expression of SARS-CoV-2 RNA vs. *H. sapiens* RNA from H522 (n=2). **C**, Principle  
573 component analysis of highly expressed genes from MOIs 0.25 and 1 across all time

574 points. **D**, Volcano plot of gene expression changes comparing mock infection to 96  
575 hours post infection of MOIs=0.25 and 1. Select changes in IFN response genes (purple)  
576 and SARS-CoV-2 genes (salmon) are highlighted. See also Table S2. **E**, Hierarchical  
577 clustering of differentially expressed genes (DEGs) after infection. Genes were filtered  
578 for an absolute  $\log_2$  fold change  $>2$  and adjusted p-value  $< 0.005$  at any time point. **F**,  
579  $\log_2$  fold changes of DEGs as grouped by clustering. The colored lines represent  
580 quantification of an individual gene whereas the solid black represents the cluster mean.  
581 **G**, Hypergeometric enrichment analysis of biological gene sets in the identified gene  
582 clusters (D-E). See also Table S3. **H**, Rank-based gene set enrichment analysis. Gene  
583 sets were queried if identified by hypergeometric analysis RNA seq (5F) or proteomics  
584 data (6E). Display indicated p-adjusted  $< 0.05$ . N.E.S. = normalized enrichment score.

585 **Figure 6. H522 infection with SARS-CoV-2 results in proteome changes within the**  
586 **type I IFN, cell cycle, and DNA replication pathways.** **A**, Experimental design of  
587 proteomics experiments. H522 cells were infected with SARS-CoV-2 at MOI=1 and  
588 harvested after 4, 12, 24, 48, 72, and 96 h. Mock-infected cells were harvested after 4  
589 and 96 h. Peptides labeled with TMT10 reagents were analyzed by liquid  
590 chromatography-mass spectrometry. **B**, Principal component analysis of whole cell  
591 proteomics of H522 cells infected with SARS-CoV-2 across a 4-day time course (n=3).  
592 **C**, Quantification of total ion intensities for each identified SARS-CoV-2 protein over time  
593 and normalized to the 4 h mock control. The shaded grey regions represent SEM. **D**,  
594 Volcano plot of protein abundance at 96hpi compared to the 96 h mock control. See also  
595 Table S4 **E**, Differentially expressed proteins from 'D' were clustered based on z-score.  
596 **F**, Quantification of total ion intensities normalized to the 4 h mock control for each  
597 protein across the 7 identified clusters in 'D'. The colored lines represent quantification of  
598 an individual protein whereas the solid black and dashed black lines represent the mean



599 of infected and mock samples, respectively. **G**, Hypergeometric enrichment analysis  
600 from three different databases for each individual cluster in 'D' (Hallmark, Reactome,  
601 Gene Ontology). The color of the circle represents significance (q-value), whereas the  
602 size of the circle indicates the percentage of the cluster represented in the pathway. See  
603 also Table S5. **H**, Distribution of Pearson's correlation coefficient between a gene's  
604 transcript and protein log<sub>2</sub> fold change over 4 h mock for all proteins and differentially  
605 expressed proteins. Correlations used the matching time points of 4, 24, 48, 72, 96 hpi.  
606 **I**, Rank-based gene set enrichment analysis. Differentially expressed proteins were  
607 ranked by their correlation to transcript levels. **J**, Protein complexes of differentially  
608 expressed H522 and SARS-CoV-2 proteins associated with DNA replication and cell  
609 cycle checkpoint. Complexes and functions were extracted from the CORUM database.  
610 The colors correspond to the whole cell proteomic clusters identified in 'D'. See also  
611 Figure S5. **K**, Protein interaction network of differentially expressed H522 and SARS-  
612 CoV-2 proteins associated with the IFN response. Interactions were determined from the  
613 BioGRID Multi-Validated Datasets. Interferon related functions were extracted from GO  
614 terms in MSigDB. The colors correspond to the whole cell proteomic clusters identified in  
615 'D'. See also Figure S5.

616 **Figure 7. MDA5 mediates the IFN response to SARS-CoV-2 infection. A**,  
617 Immunoblot depicting the IFN response in H522 cells infected with SARS-CoV-2 over  
618 time (representative of n=2).  $\beta$ -actin represents the loading control. **B**, ISG mRNA levels  
619 was detected by qRT-PCR in H522 cells infected with SARS-CoV-2 96 hpi. H522 cells  
620 were either mock transfected or transfected with a non-targeting (NT) siRNA 24 h prior  
621 to infection. **C**, ISG mRNA levels was detected by qRT-PCR in H522 cells infected with  
622 SARS-CoV-2 96 hpi. H522 cells were transfected with a non-targeting (NT) siRNA or a  
623 panel of siRNAs targeting genes involved in viral sensing 24 h prior to infection. \*  
624 indicates p<0.05, \*\* indicates p<0.01 and \*\*\* indicates p<0.001 where significance was

625 determined using two-way ANOVA and the Dunnett correction for multiple comparisons.  
626 See also Figure S6. **D**, qRT-PCR for cell-associated SARS-CoV-2 RNA in H522 cells  
627 96hpi. H522 cells were transfected with a non-targeting (NT) siRNA or a panel of siRNAs  
628 targeting genes involved in viral sensing 24 hours prior to infection.

## 629 **STAR METHODS**

### 630 **Resource Availability**

#### 631 *Lead Contact*

632 Further information and requests for reagents and resources should be directed to and  
633 will be fulfilled by the Lead Contact, Sebla B. Kutluay (kutluay@wustl.edu).

#### 634 *Materials Availability*

635 All unique reagents generated in this study are available from the Lead Contact

#### 636 *Data and code availability*

637 Raw RNA sequencing data are available on the GEO repository (GSE163547) and NCBI  
638 SRA (bioproject, PRJNA523380 and PRJNA533478) for the lung and head/neck cancer  
639 cell lines.

640  
641 Raw proteomics data are available via ProteomeXchange with identifier PXD023754.  
642 Reviewer account details:

643 **Username:** reviewer\_pxd023754@ebi.ac.uk

644 **Password:** b2aH27kS

645

646 R scripts to process data and generate figures are available on GitHub:

647 [https://github.com/GoldfarbLab/H522\\_paper\\_figures](https://github.com/GoldfarbLab/H522_paper_figures)

648

### 649 **Experimental Model and Subject Details**

#### 650 *Viral Strains*

651 SARS-CoV-2 strain 2019-nCoV/USA-WA1/2020 was obtained from Centers for Disease  
652 Control and Prevention (a gift of Natalie Thornburg). SARS-CoV-2 was propagated in  
653 Vero CCL-81 cells (America Type Culture Collection (ATCC)-CCL-81) at an MOI of 0.01  
654 grown in Dulbecco's Modified Eagle's Medium (DMEM, Sigma), supplemented with 10%  
655 Fetal Bovine Serum (FBS, VWR) and 10 mM HEPES buffer (Corning). After  
656 amplification, the virus was titered on Vero E6 cells (ATCC-CRL1586) by plaque assays  
657 and sequenced to confirm identity. E484D (100%) and R682W substitutions (10-40%)  
658 were found in our virus stocks, but we did not observe selection of additional S  
659 mutations following growth in H522 cells. All experiments involving SARS-CoV-2 were  
660 performed in a biosafety level 3 laboratory.

661 VSV-GFP-SARS-CoV-2-S<sub>Δ21</sub> virus was kindly provided by Dr. Sean Whelan  
662 (Washington University, St. Louis) and used as previously described (Case et al., 2020).  
663 Briefly, the VSV-GFP-SARS-CoV-2-S<sub>Δ21</sub> virus was propagated in the MA104 cell line  
664 (ATCC-CRL-2378.1) cultured in Medium 199 (Gibco) supplemented with 10% FBS, 1%  
665 penicillin–streptomycin, and 20 mM HEPES pH 7.7. MA104 cells were infected at an  
666 MOI of 0.01 at 37°C. After 1 hour, the media was replaced with Medium 199  
667 supplemented with 10% FBS and 1% penicillin–streptomycin and grown at 34°C. The  
668 viral supernatant was collected 48 hpi and cell debris was cleared by centrifugation for  
669 7.5 mins at 1000 x g. All experiments involving VSV-GFP-SARS-CoV-2-S<sub>Δ21</sub> were done  
670 in a biosafety level 2 laboratory.

### 671 *Cell Culture*

672 All cell lines were maintained in a humidified incubator at 37°C with 5% CO<sub>2</sub> unless  
673 otherwise indicated. Cell line identities were validated by short tandem repeat analysis  
674 (LabCrop, Genetica Cell Line Testing) and cultures were regularly tested for

675 mycoplasma contamination using the MycoAlert mycoplasma detection kit (Lonza). The  
676 KYSE30 and SCC25 cell lines were a kind gift from the John Hayes Lab (UTHSC). The  
677 Vero CCL81 and Vero E6 cells were cultured in DMEM, supplemented with 10% FBS  
678 and 10 mM HEPES buffer. The A427 (kind gift from Bernard Weissman Lab (UNC)) and  
679 Detroit562 (ATCC-CCL-138) cell lines were cultured in Eagle's Minimum Essential  
680 Medium (EMEM, Corning), supplemented with 10% FBS (Sigma), 1% penicillin-  
681 streptomycin (Corning), and 2 mmol/L  $\alpha$ -glutamine (Gibco). The SCC25 cell line was  
682 cultured in DMEM:F12 (Corning) supplemented with 10% FBS (Sigma), 1% penicillin-  
683 streptomycin (Corning), and 400ng/ml hydrocortisone (Sigma). The H522 (ATCC-CRL-  
684 5810), H596 (ATCC HTB-178), H1299 (ATCC CRL-5803), HCC827 (ATCC CRL-2868),  
685 PC-9 (Sigma #90071810), KYSE30 (kind gift from Luke Chen (NCCU)), and OE21  
686 (Sigma # 96062201) cell lines were cultured in RPMI-1640 (Corning) supplemented with  
687 10% FBS (Sigma) and 1% penicillin-streptomycin (Corning). HEK293T and Calu-3  
688 (ATCC-HTB-55) cells were cultured in DMEM (Sigma), supplemented with 10% FBS  
689 (VWR). PgsA-745 (ATCC #CRL 2242) cells were cultured in DMEM/nutrient mixture F-  
690 12 Ham, supplemented with 10% FBS (VWR).

691 Human airway epithelial cells were isolated from surgical excess of tracheobronchial  
692 segments of lungs donated for transplantation as previously described and were exempt  
693 from regulation by US Department of Health and Human Services regulation 45 Code of  
694 Federal Regulations Part 46 (Horani et al., 2012). Tracheobronchial cells were expanded  
695 in culture, seeded on supported membranes (Transwell; Corning, Inc.), and  
696 differentiated using ALI conditions as detailed before (Horani et al., 2018; You et al.,  
697 2002).

698 *hACE2 cloning*

699 The *Homo sapiens* angiotensin-converting enzyme 2 (ACE2), transcript variant 2 amino  
700 acid sequence (NCBI Reference Sequence: NM\_021804.3) was reverse translated  
701 using the Sequence Manipulation Suite and codon optimized using Integrated DNA  
702 Technologies' Codon Optimization Tool. This fragment was synthesized as a gene block  
703 (IDT), with 5'-TTTTCTTCCATTTTCAGGTGTCGTGAGGATCC added to the 5' end and 5'-  
704 TGAGAATTCCTCGAGGGCGGCCGCTCTAGAGTC added to the 3' end. This product  
705 was then inserted into the pLV-EF1a-IRES-Puro vector (Addgene Plasmid #85132) that  
706 had been digested with EcoRI and BamHI using Gibson Assembly (NEB). The sequence  
707 of the resulting construct was confirmed by Sanger sequencing and propagated in Stbl3  
708 *E. coli* cells (Life Technologies) at 30°C followed by MaxiPrep (Qiagen).

#### 709 *Lentivirus production and transduction*

710 ACE2 expressing H522 and primary basal airway epithelial cells were generated as  
711 follows. Recombinant lentivirus was produced in HEK293T cells using a vector that  
712 expresses ACE2 driven by EF1 and a cassette to confer puromycin resistance together  
713 with psPAX2 packaging (Addgene #12260) and VSV-G envelope plasmids (Addgene  
714 #12259) as described (Horani et al., 2013). H522 and basal epithelial cells were  
715 incubated with virus-containing medium for 24 h, expanded for 3 days, then selected in  
716 puromycin (2.5 µg/mL) for 3 days.

#### 717 *SARS-CoV-2 infections, plaque assays and FACS.*

718 Prior to infection, cells were seeded at 70-80% density. Infections were done by addition  
719 of virus inoculum in cell culture media supplemented with 2% FBS and intermittent  
720 rocking for 1 h. Virus inoculum was removed, cells washed twice with 1x phosphate-  
721 buffered saline (PBS) and plated in cell culture media containing 10% FBS. Infections  
722 were monitored by plaque assays and Q-RT-PCR in cell culture supernatants. Briefly, for

723 plaque assays, Vero E6 cells were challenged with 10-fold serial dilutions of virus-  
724 containing supernatant, incubated for 1 h at 37°C with intermittent rocking, followed by  
725 addition of 2% methylcellulose and 2X MEM containing 4% FBS. 3 days post infection  
726 cells were fixed by 4% paraformaldehyde (PFA) and stained with crystal violet solution.  
727 For plaque assays and focus forming assays (FFA) in H522 cells, 2% methylcellulose  
728 and 2X RPMI containing 10% FBS combination was used. For FACS, cells were  
729 detached then fixed with 4% PFA for 20 min at room temperature, followed by  
730 permeabilization using 0.5% Tween-20 in PBS for 10 min. Cells were blocked with 1%  
731 bovine serum albumin (BSA) and 10% FBS in 0.1% Tween-20 PBS (PBST) for 1 h prior  
732 to staining with a rabbit polyclonal anti SARS-CoV-2 nucleocapsid antibody (Sino  
733 Biological Inc. catalog # 40588-T62) diluted 1:500 and incubated overnight at 4°C. The  
734 following day, after washed cells were stained with an Alexa Fluor 488-conjugated goat  
735 anti-rabbit secondary antibody (Invitrogen) at 1:1000 dilution. FACS was performed  
736 using a BD LSR Fortessa flow cytometer and analyzed by FlowJo software. For FFA,  
737 attached cells were fixed, and stained as described for FACS, but for permeabilization  
738 0.1% Triton-X100 was used, images were analyzed using biomolecular imager Typhoon  
739 and ImageJ software.

#### 740 *RNA extraction, qRT-PCR, and RNA-seq*

741 Cell associated RNA was extracted by Zymo RNA-clean and concentrator-5 kit following  
742 lysis of infected cells in 1X lysis buffer (20 mM TrisHCl, 150 mM NaCl, 5 mM MgCl<sub>2</sub>, 1%  
743 Triton X-100, 1 mM DTT, 0.2 U/μL SuperaseIN RNase Inhibitor, 0.1% NP-40) and  
744 following the manufacturer's instructions, or by Trizol extraction (Thermo Fisher  
745 Scientific). Extracted RNA was either subjected to Q-RT-PCR analysis for viral RNAs,  
746 cellular RNA, or RNA-seq. Viral RNA in cell culture supernatants was quantitated as  
747 detailed before (Shema Mugisha et al., 2020b). In brief, 5 μL of supernatant was mixed

748 with 5  $\mu$ L of 2x lysis buffer (2% Triton X-100, 50mM KCl, 100mM TrisHCl pH7.4, 40%  
749 glycerol supplemented with 400u/mL of SuperaseIN (Life Technologies)), followed by  
750 addition of 90  $\mu$ L of 1X core buffer (5 mM (NH<sub>4</sub>)<sub>2</sub>SO<sub>4</sub>, 20 mM KCl and 20 mM Tris–HCl  
751 pH 8.3). 10  $\mu$ L of this sample was used in a TaqMan-based Q-RT-PCR assay using  
752 TaqMan™ RNA-to-CT™ 1-Step Kit (Applied Biosystems, #4392938), alongside with  
753 RNA standards, targeting SARS-CoV-2 N gene. The primers and probe sequences are  
754 as described before (Shema Mugisha et al., 2020b). To study the interferon (IFN)  
755 response, cellular RNA was reverse transcribed with High-Capacity cDNA Reverse  
756 Transcription kit (Thermo Fisher Scientific) followed by Q-RT-PCR analysis using  
757 PowerUp SYBR Green Master Mix (Applied Biosystems). RNA levels were quantified  
758 using the  $\Delta C_T$  method with *18S rRNA* as the reference target. ISG-specific primers are  
759 listed in Table S6.

760 RNA from human lung and airway cell lines were extracted using the PureLink RNA Mini  
761 Kit (Invitrogen). RT-PCR was performed on 1 $\mu$ g of RNA using the iScript™ gDNA Clear  
762 cDNA Synthesis Kit (Bio-Rad) and analyzed by qPCR using PowerUp SYBR Green  
763 Master Mix (Applied Biosystems) on a QuanStudio 5 machine. RNA levels were  
764 quantified using the  $\Delta C_T$  method with *RPL13a* as the reference target. Gene specific  
765 primers are listed in Table S6.

766 Samples were prepared for RNA-seq using the Truseq stranded mRNA kit (Illumina) and  
767 subjected to sequencing on a Next-seq platform (1x75bp) at the Center for Genome  
768 Sciences at Washington University.

#### 769 *Immunofluorescence, RNA-ISH, and transmission electron microscopy*

770 SARS-CoV-2 RNA and N protein were visualized in infected cells according to the  
771 published multiplex immunofluorescent cell-based detection of DNA, RNA and Protein

772 (MICDDRP) protocol (Puray-Chavez et al., 2017). H522 cells were plated on 1.5 mm  
773 collagen-treated coverslips (GG-12-1.5-Collagen, Neuvitro) placed in 24-well plates one  
774 day prior to infection. Cells were infected with SARS-CoV-2 as above and fixed with 4%  
775 PFA at various time points post infection. Following fixation, cells were dehydrated with  
776 ethanol and stored at -20°C. Prior to probing for vRNA, cells were rehydrated, incubated  
777 in 0.1% Tween in PBS for 10 min, and mounted on slides. Probing was performed using  
778 RNAScope probes and reagents (Advanced Cell Diagnostics.) Briefly, coverslips were  
779 treated with protease solution for 15 min in a humidified HybEZ oven (Advanced Cell  
780 Diagnostics) at 40°C. The coverslips were then washed with PBS and pre-designed  
781 anti-sense probes specific for SARS-CoV-2 positive strand S gene encoding the spike  
782 protein (RNAScope Probe-V-nCoV2019-S, cat# 848561) were applied and allowed to  
783 hybridize with the samples in a humidified HybEZ oven at 40°C for 2 hr. The probes  
784 were visualized by hybridizing with preamplifiers, amplifiers, and finally, a fluorescent  
785 label. First, pre-amplifier 1 (Amp 1-FL) was hybridized to its cognate probe for 30 min in  
786 a humidified HybEZ oven at 40°C. Samples were then subsequently incubated with  
787 Amp 2-FL, Amp 3-FL, and Amp 4A-FL for 15 min, 30 min, and 15 min respectively.  
788 Between adding amplifiers, the coverslips were washed with a proprietary wash buffer.  
789 After probing for vRNA, samples were immunostained for the viral N protein. Coverslips  
790 were incubated in 1% bovine serum albumin (BSA) and 10% FBS in PBS containing  
791 0.1% Tween-20 (PBST) at room temperature for 1 h. Samples were then incubated in a  
792 primary rabbit polyclonal SARS-CoV-2 nucleocapsid (N) antibody (Sino Biological Inc.,  
793 Cat # 40588-T62) at 4°C overnight. After washing in PBST, the samples were then  
794 incubated in a goat anti-rabbit fluorescent secondary antibody (Invitrogen Alexa Fluor  
795 Plus 680, Cat# A32734) at room temperature for 1 h. Nuclei were stained with DAPI  
796 diluted in PBS at room temperature for 5 min. Finally, coverslips were washed in PBST  
797 followed by PBS and then mounted on slides using Prolong Gold Antifade.



798 Images were taken using a Zeiss LSM 880 Airyscan confocal microscope equipped with  
799 a  $\times 63/1.4$  oil-immersion objective using the Airyscan super-resolution mode. Images  
800 were taken of the samples using either the  $\times 63$  or  $\times 10$  objective.

801 For ultrastructural analyses by transmission electron microscopy, samples were fixed in  
802 2% paraformaldehyde/2.5% glutaraldehyde (Polysciences Inc., Warrington, PA) in 100  
803 mM sodium cacodylate buffer, pH 7.2 for 1 h at room temperature. Samples were  
804 washed in sodium cacodylate buffer and postfixed in 1% osmium tetroxide (Polysciences  
805 Inc., Warrington, PA) for 1 h. Samples were then rinsed extensively in dH<sub>2</sub>O prior to en  
806 bloc staining with 1% aqueous uranyl acetate (Ted Pella Inc., Redding, CA) for 1  
807 h. After several rinses in dH<sub>2</sub>O, samples were dehydrated in a graded series of ethanol  
808 and embedded in Eponate 12 resin (Ted Pella Inc., Redding, CA). Sections of 95 nm  
809 were cut with a Leica Ultracut UCT ultramicrotome (Leica Microsystems Inc.,  
810 Bannockburn, IL), stained with uranyl acetate and lead citrate, and viewed on a JEOL  
811 1200 EX transmission electron microscope (JEOL USA Inc., Peabody, MA) equipped  
812 with an AMT 8 megapixel digital camera and AMT Image Capture Engine V602 software  
813 (Advanced Microscopy Techniques, Woburn, MA).

#### 814 *Live cell imaging and quantification*

815 VSV-SARS-CoV-2-S <sub>$\Delta 21$</sub>  viral infection rates were imaged and quantified using the  
816 Incucyte® S3 Life Cell Analysis System. VeroE6, H522, and H522-ACE2 cells were  
817 labeled with Incucyte® NucLight Red (Sartorius #4625) to generate stable expression of  
818 the red nuclear marker. Basal airway epithelial cells (AEC) were labeled with Incucyte®  
819 NucLight Rapid Red (Sartorius #4717) at the time of infection. VSV-SARS-CoV-2-S <sub>$\Delta 21$</sub>   
820 was then added to cells and immediately placed in the Incucyte®. Phase and fluorescent

821 images were taken every hour to track viral infection. Percentage of GFP positive cells  
822 was calculated by dividing green object count by red object count for each well.

### 823 *Immunoblotting*

824 Human cell lines were grown to 70% confluence and lysed in RIPA (10% glycerol, 50mM  
825 Tris-HCl pH 7.4, 150mM NaCl, 2mM EDTA, 0.1% SDS, 1% NP40, 0.2% sodium  
826 deoxycholate) containing protease and phosphatase inhibitors (Thermo Scientific).  
827 Proteins were separated by SDS-PAGE, transferred to a nitrocellulose membrane,  
828 blocked in 5% milk, and incubated with primary antibodies overnight at 4°C. Washed  
829 membranes were incubated for 45 min at room temperature in secondary antibody  
830 solution (LI-COR IRDye 680, 800; 1:10,000 in 5% milk), imaged on an Odyssey® CLX,  
831 and analyzed using Image Studio Software. Antibodies were used at the following  
832 dilutions: ACE2 (R&D Systems #AF933, 1:200),  $\beta$ -actin (Sigma #A5316, 1:5000),  
833 Vinculin (Santa Cruz #sc-73614, 1:2000), AAK1 (Bethyl #A302-146A, 1:1000), AP2M1  
834 (Abcam #ab75995, 1:1000), pAP2M1-T156 (Cell Signaling #3843, 1:1000), SARS-CoV-  
835 2-N (Sino Biological #40588-T62, 1:500), pSTAT1-Y701 (Cell Signaling #9167, 1:1000),  
836 pSTAT1-S727 (Cell Signaling #8826, 1:1000), STAT1 (Cell Signaling #14994, 1:1000),  
837 MX1 (Cell Signaling #37849, 1:1000), IFIT1 (Cell Signaling #14769, 1:1000), pIKK $\alpha$ / $\beta$ -  
838 S176/180 (Cell Signaling #2697, 1:1000), IKK $\alpha$  (Cell Signaling #11930, 1:1000), IKK $\beta$   
839 (Cell Signaling #8943, 1:1000), pNFkB p65-S536 (Cell Signaling #3033, 1:1000), NFkB  
840 p65 (Cell Signaling #8242, 1:1000),

### 841 *ACE2 CRISPR KO*

842 H522 cells were transduced with a pLentiCRISPRv2 derived vector targeting *ACE2*  
843 (Genscript). The sgRNA (GTACTGTAGATGGTGCTCAT) targets exon 3 of *ACE2*  
844 (CCDS14169). After transduction, cells were selected in 3  $\mu$ g/mL puromycin. Editing

845 efficiency in the polyclonal population was determined using the Genomic Cleavage  
846 Detection assay (Invitrogen #A24372) and following the manufacturers protocol. The  
847 region surrounding the cleavage site was amplified using ACE2\_Screen-F and  
848 ACE2\_Screen-R with the sequences listed in Table S6. H522 ACE2 KO monoclonal  
849 populations were generated by limiting dilution in 96-well plates and confirmed by sanger  
850 sequencing using the above ACE2\_Screen primers.

#### 851 *siRNA transfections*

852 H522 cells were reverse-transfected by siRNAs targeting Toll-like receptor and RIG-I-like  
853 receptor pathway components. The complete sequence and catalog numbers for each  
854 siRNA are listed in Table S6. In brief, 2.5 pmoles of two siRNAs for each target was  
855 combined (total of 5 pmoles) and complexed with 0.75  $\mu$ L of RNAimax transfection  
856 reagent following manufacturer's recommendations and added in 24-well cell culture  
857 dishes. H522 cells were then seeded at  $1 \times 10^5$  cells/well. Transfected cells were infected  
858 1-day post-transfection with SARS-CoV-2 virus, and RNA extracted 3 or 4 days later by  
859 Trizol and processed for Q-RT-PCR analysis.

#### 860 *Pharmacological effects on SARS-CoV-2 infections*

861 In experiments where the mechanism of viral entry was probed, cells were pretreated  
862 with compounds, antibodies and ACE2-Fc as indicated in figure legends. Following viral  
863 adsorption, cells were continually kept in the presence of compounds till harvesting of  
864 the cell-associated total RNA by Trizol extraction.

#### 865 *Whole cell proteomics sample preparation*

866 The whole cell protocol was generally followed as described before (Mertins et al.,  
867 2018). Briefly, H522 cells were grown to 80-90% confluency in 10cm cell culture dishes

868 and then infected with SARS-CoV-2 (MOI=1 pfu/cell) for indicated time points. Cells  
869 were then lysed in urea lysis buffer containing 8 M urea, 75 mM NaCl, 50 mM Tris (pH  
870 8.0), 1 mM EDTA, phosphatase and protease inhibitors. Samples were high speed  
871 cleared for 15 min at max speed and protein concentration was determined via BCA.  
872 1mg of protein lysate was aliquoted, then reduced with 5mM DTT and alkylated with  
873 15mM chloroacetamide. The sample was then diluted with 50 mM Tris-HCl (pH 8.0) to  
874 decrease the urea concentration to <2 M. Lysyl endopeptidase (Wako Chemicals, 129-  
875 02541) was then added at a 1mAU to 50 $\mu$ g of protein and incubated at 30°C for 4 h.  
876 Trypsin (Promega, PR-V5113) was then added in an enzyme/substrate ratio of 1:49  
877 (wt/wt) for overnight digestion at 30°C. The reaction was quenched by acidifying the  
878 mixture to a concentration of 1% formic acid. Peptides were desalted using a 200-mg  
879 tC18 SepPak cartridge (Waters Technologies, WAT054925) with a vacuum manifold  
880 (protocol followed exactly as described in (Mertins et al., 2018)) and speedvac'd dry. The  
881 sample was then resuspended in 50 mM HEPES (pH 8.5). The peptide concentration  
882 was determined by a quantitative fluorometric peptide assay kit (Pierce, PI23290). TMT  
883 labeling protocol from Zecha J, et al. was followed, except for labeling duration (Zecha et  
884 al., 2020). Briefly, 300 $\mu$ g of peptide was aliquoted for TMT labeling and brought to a total  
885 volume of 60 $\mu$ L. TMT labels (Thermo, PIA37725) were resuspended in anhydrous  
886 acetonitrile so that the concentration of each label is 20 $\mu$ g/ $\mu$ L. 15 $\mu$ L of label (300 $\mu$ g) was  
887 added to the sample and incubated at 25°C for 6 h. A test mix for labeling efficiency and  
888 label abundance was analyzed by mass spectrometry prior to mixing the samples.  
889 Samples were mixed according to the ratio determined by the test mix. The mixed  
890 sample was then desalted using a 200-mg tC18 SepPak cartridge (Waters  
891 Technologies, WAT054925) with a vacuum manifold (protocol followed exactly as  
892 described in (Mertins et al., 2018)), speedvac'd dry, and resuspended in HPLC

893 compatible buffer. HPLC fractionation and fraction pooling was followed exactly as  
894 described in (Mertins et al., 2018). Following fractionation, samples were pooled to 25  
895 fractions, speedvac'd dry, and resuspended in mass spec compatible buffer. 5% of each  
896 fraction was then analyzed by mass spectrometry for global whole cell proteomics.

#### 897 *Mass spectrometry data acquisition*

898 Trypsinized peptides were separated via reverse-phase nano-HPLC using an  
899 RSLCnano Ultimate 3000 (Thermo Fisher Scientific). The mobile phase consisted of  
900 water + 0.1% formic acid as buffer A and acetonitrile + 0.1% formic acid as buffer B.  
901 Peptides were loaded onto a  $\mu$ PAC $\square\square$  Trapping column (PharmaFluidics) and  
902 separated on a 200 cm  $\mu$ PAC $\square\square$  column (PharmaFluidics) operated at 30°C using a  
903 110 min gradient from 2% to 30% buffer B, followed by a 10 min gradient from 30% to  
904 45% buffer B, flowing at 300 nL/min. Mass spectrometry analysis was performed on an  
905 Orbitrap Eclipse (Thermo Fisher Scientific) operated in data-dependent acquisition mode  
906 and used real-time sequencing (RTS) to trigger MS3 scans. MS1 scans were acquired in  
907 the Orbitrap at 120k resolution, with a 100% normalized automated gain control (AGC)  
908 target, auto max injection time, and a 375-1800 m/z scan range. MS2 targets were  
909 filtered for  $\geq 50\%$  precursor fit MS2,  $\geq 2e4$  signal intensity, charges 2-6, with a dynamic  
910 exclusion of 60 seconds, and were accumulated using a 1.2 m/z quadrupole isolation  
911 window. MS2 scans were performed in the ion trap at a turbo scan rate following  
912 collision induced dissociation (CID) at 35% collision energy. MS2 scans used a 100%  
913 normalized AGC target and auto max injection time. MS3 scans were triggered upon  
914 peptide identification using RTS. For RTS, the UniProtKB/Swiss-Prot human sequence  
915 database including isoforms (downloaded Aug. 2019) was appended with the SARS-  
916 CoV-2 proteome from UniProtKB and common contaminants from MaxQuant (Tyanova  
917 et al., 2016; UniProt, 2019). RTS parameters were set to a tryptic digestion with one

918 missed cleavage, static Carbamidoemthyl cysteine modification (+57.0215) and TMT10  
919 (+229.1629) on lysines and N-termini, and a variable oxidized methionine modification  
920 (+15.9949) and a maximum of 2 variable modifications per peptide. FDR filtering and  
921 protein close-out were enabled with a maximum of 5 peptides per protein and maximum  
922 search time of 50ms. The RTS scoring thresholds were set to Xcorr = 2.0, dCN = 0.1,  
923 and precursor ppm = 10 for all charges. MS3 scans were performed on the 10 most  
924 intense MS2 fragment ions identified by RTS and isolated using Synchronous Precursor  
925 Selection. MS3 scans used a normalized AGC target of 300%, auto max injection time,  
926 50k resolution, 55% higher-energy collision dissociation collision energy, and 2 m/z wide  
927 MS2 isolation window. Acquisition was performed with a 2.5 second cycle time.

#### 928 *Whole cell proteomics raw data processing*

929 Raw MS data files were processed by MaxQuant (version 1.6.16.0) with the same  
930 sequence database used for RTS during data acquisition. The following parameters  
931 were used: specific tryptic digestion with up to two missed cleavages, fixed  
932 carbamidomethyl modification, variable modifications for protein N-terminal acetylation,  
933 methionine oxidation, and asparagine deamidation, match between runs, and reporter  
934 ion MS3 quantification. Lot specific impurities were used for the TMT labels.

#### 935 **Quantification and Statistical Analysis**

936 Statistical parameters and details for each experiment are reported in respective figure  
937 legends. Generally, experiments were repeated with at least three biological replicates,  
938 represented by n. Each plot includes points for individual biological replicates and mean  
939  $\pm$  SEM error bars unless otherwise specified.

940 GraphPad Prism 9 software was used for statistical analysis. Two-way ANOVA was  
941 performed to assess significance and post hoc comparisons were employed using the  
942 Dunnett or Tukey test to correct for multiple comparisons. For statistical analysis of viral  
943 RNA (copies/cell), the data was log transformed prior to performing two-way ANOVA.  
944 The R statistical programming language was used for data processing and figure  
945 generation.

#### 946 *RNA-seq data*

947 In order to standardize RNA-seq data from 3 different protocols in Figure 1A and Figure  
948 S1, one of which used single end 50 base reads, all reads were trimmed to 50 bp length  
949 with FASTX-Toolkit (v0.0.13) and only the reads of the first pair were considered to  
950 adjust varying read lengths and technology. Those trimmed reads were mapped to the  
951 GRCh38 genome, aided with the Gencode v35 annotation of the transcriptome with  
952 STAR (v2.7.0.f\_0328). Gene expression was quantified with Salmon (v1.3.0) in  
953 alignment-based mode (Patro et al., 2017). The resulting counts were normalized to a  
954 fixed upper quartile.

955 Salmon v1.1.0 was used for quantification of H522 RNA-seq data (Figure 5). Salmon  
956 indexes were constructed for both hg38, Gencode v27; as well as Sars-CoV-2 based on  
957 reference genome NC\_045512.2. The R tximport package was used for per gene  
958 aggregation of human transcripts based on quantification from Salmon, using Gencode  
959 v27 as well (Soneson et al., 2015). Relative expression SARS-CoV-2 RNA was  
960 expressed in terms of the log transformed ratio of total reads mapping to SARS-CoV-2  
961 vs. hg38. 95% confidence intervals were calculated based on the assumption of  
962 normally distributed error.

963 Principle component analysis was performed without low-expressed genes. Starting  
964 with gene level read count quantification from Salmon and tximport as above. Genes  
965 with more than 5 counts-per-million in at least 24/48 samples were selected as an initial  
966 pre-processing step. Data normalization was performed by using the trimmed mean of  
967 M-values methods as implemented in the calcNormFactors function from the edgeR  
968 package. Normalized read counts were converted to counts-per-million and log<sub>2</sub>  
969 transformed (logCPM). Principle component analysis was performed with the R function  
970 prcomp with data centering.

971 Differential expression analysis was performed starting with gene level read count  
972 quantification from Salmon and tximport as above. Marginally detected genes (less than  
973 5 counts-per-million in less than 8/48 samples) were removed, as an initial pre-  
974 processing step. Data normalization was performed by using the trimmed mean of M-  
975 values methods as implemented in the calcNormFactors function from the edgeR  
976 package (Robinson et al., 2010). Normalized read counts were converted to counts-per-  
977 million and log<sub>2</sub> transformed (logCPM). Differential expression analysis was  
978 subsequently performed using the Limma R-packages functions voom and eBayes  
979 (Ritchie et al., 2015). Mock infection was compared pairwise with post-infection time  
980 points, using data aggregated from the two highest MOIs (0.25 and 1.0) which appeared  
981 to have indistinguishable levels of SARS-CoV-2 gene expression. Multiple comparison  
982 correction was then performed based on the per-gene p.values from the eBayes function  
983 using the R package fdrTool. Log<sub>2</sub> fold-change values (logFC) were utilized as estimated  
984 by the limma eBayes function.

985 Data from the two highest MOIs were used, as above, in order to cluster based on  
986 temporal gene expression changes. LogCPM values for replicate conditions were



987 averaged. Data were then filtered for genes with both an adjusted p-value of  $< 0.005$  and  
988 an absolute  $\log_{2}FC > 2$  at some time point in the experiment.

989 *Whole-cell proteomics data*

990 Protein abundances were computed by summing TMT reporter intensities for all spectra  
991 from a protein group's razor and unique peptides. MS3 spectra were filtered to have  
992  $>4e3$  summed TMT reporter intensity and a non-missing value for the pooled bridge  
993 channel. Protein groups were filtered to have at least two unfiltered MS3 spectra in at  
994 least two of three replicate experiments. Missing values for protein abundances were  
995 imputed with the minimum protein intensity observed in the dataset. To correct for  
996 loading differences, protein abundances were normalized to have equal total abundance  
997 per TMT channel. To facilitate comparison between the three TMT-plexes, protein  
998 abundances were then divided by their corresponding pooled bridge abundance.

999 Differential expression was determined with the R Limma package. Moderated t-  
1000 statistics were computed between the 96 mock and 96 hpi samples with default settings.  
1001 Benjamini-Hochberg adjustment was used for multiple test correction. Significance filters  
1002 of an adjusted p-value  $< 0.05$  and an absolute  $\log_{2}$  fold-change  $> \log_{2}(1.3)$  were used.  
1003 The lower fold-change threshold was employed in order to capture proteins whose  
1004 differential expression peaked at other time points.

1005 Protein-protein interactions for human proteins were extracted from BioGRID's multi-  
1006 validated dataset (downloaded Jan. 2021) (Oughtred et al., 2021). Interactions between  
1007 human and SARS-CoV-2 proteins were extracted from BioGRID's COVID-19  
1008 Coronavirus Project dataset (downloaded Jan. 2021) and filtered for interactions passing  
1009 multi-validated criteria. Protein complexes were downloaded from CORUM (Giurgiu et

1010 al., 2019). Complexes were extracted for further analysis if they contained >2 proteins  
1011 and >50% of the proteins were differentially expressed.

#### 1012 *Cluster analysis*

1013 RNA-seq LogCPM values and protein abundances values were each converted to per-  
1014 gene z-scores. Consensus clustering was then performed with the R  
1015 ConsensusClusterPlus package (Wilkerson and Hayes, 2010). The non-defaults settings  
1016 used were: reps=50, innerLinkage="complete", and finalLinkage="ward.D2". The optimal  
1017 number of seven clusters was chosen by manual inspection of clustering quality for  
1018 consensus matrices with k=1-12.

#### 1019 *Gene set enrichment analysis*

1020 Over-representation of biological gene sets in individual temporal gene clusters for RNA-  
1021 seq and proteomics data were investigated using the R clusterProfiler package and  
1022 enricher function (Yu et al., 2012). Gene sets were downloaded from the MSIG data  
1023 bank via the msigdb R-project package, including "Hallmark", "Reactome", "GO:BP",  
1024 and "GO:CC." (Jassal et al., 2020; Liberzon et al., 2015; Liberzon et al., 2011). Gene  
1025 sets were considered significantly enriched in a cluster if adjusted p-values were < 0.05  
1026 for proteomics. "Hallmark" and "Reactome" gene sets were similarly queried in the RNA-  
1027 seq data using clusterProfiler, with a cutoff for significance of adjusted p-value < 0.1.

1028 Gene set enrichment analysis was performed on RNA-seq logCPM values (Figure 5G).  
1029 Genes were ranked according to signal to noise ratio as defined by the Broad Institute  
1030 GSEA software -  $(\mu_a - \mu_b)/(\sigma_a + \sigma_b)$ . Where  $\mu$  is average the logCPM of a given gene  
1031 under one experimental condition and  $\sigma$  the related standard deviation. Gene set  
1032 enrichment analysis was then performed with default settings using the R-project fgsea

1033 package. Test gene-sets were downloaded from the MSIG data bank via the msigdb R-  
1034 project package. Only gene sets significantly associated with temporal expression  
1035 clusters (using enrichr) in RNA-seq or whole cell proteomics data were subject to GSEA.  
1036 Gene sets with adjusted p-values < 0.05 detected for at least one time point were  
1037 considered significant.

## 1038 SUPPLEMENTAL INFORMATION

1039 **Figure S1. Expression of ACE2 across cell line models, related to Figure 1. A,**  
1040 Unsupervised hierarchical clustering of upper quartile-normalized RNA-seq reads.  
1041 Normalized RNA-seq reads were aligned to the GRCh38 and Vervet-African green  
1042 monkey genomes and quantified with Salmon (v1.3.0). As indicated, RNA-seq data were  
1043 generated at UNC or Washington University or obtained from the Sequence Read  
1044 Archive (SRA). **B,** Read counts for *ACE2*, *GAPDH* and *ACTB* across the indicated cell  
1045 models.

1046 **Figure S2. Visualization of SARS-Cov-2 replication and spread in H522 cells,**  
1047 **related to Figure 1. A,** Representative images of H522 cells infected with SARS-CoV-2  
1048 at the indicated time points and MOIs. H522 cells were fixed and stained for SARS-CoV-  
1049 2 RNA (green) by RNAScope reagents and Nucleocapsid (N) protein (red) and imaged  
1050 by confocal microscopy (n=2). **B,** Quantification of vRNA puncta in H522 cells infected  
1051 with variable MOIs of SARS-CoV-2. Greater than 150 cells per sample from 5 different  
1052 fields were counted in a blinded manner from a representative experiment.

1053 **Figure S3. ACE2 knockout via CRISPR in H522 and Calu-3 cell lines, related to**  
1054 **Figure 3. A,** Genomic Cleavage Detection Assay (Invitrogen) was performed following  
1055 the manufacturer's protocol on ACE2 WT or ACE2 KO CRISPR modified polyclonal  
1056 cells. **B,** Sanger sequencing of genomic *ACE2* at exon 3. Unique monoclonal

1057 populations of H522 ACE2 KO's were aligned to the human genome ('Ref'; hg38). The  
1058 red dashed lines indicate small deletions within exon 3 of ACE2.

1059 **Figure S4. Comparative analysis of infection pathways in H522 and other**  
1060 **permissive cells, related to Figure 4.** H522, H522-ACE2 and Vero E6 cells were pre-  
1061 treated with bafilomycin A (vATPase inhibitor), SGC-AAK1-1 (clathrin-mediated  
1062 endocytosis inhibitor), E64D (endosomal cathepsins inhibitor), apilimod (PIKfyve  
1063 inhibitor), or camostat mesylate (TMPRSS2 inhibitor) for 1 h and then infected with  
1064 SARS-CoV-2 in the presence of the inhibitors. Cell-associated SARS-CoV-2 RNA was  
1065 detected by qRT-PCR 24 hpi and normalized to DMSO treated cells (n≥3). \* indicates  
1066 p<0.05, \*\* indicates p<0.01, and \*\*\* indicates p<0.001 compared to DMSO treated  
1067 controls where significance was determined using two-way ANOVA and the Dunnett  
1068 correction for multiple comparisons.

1069 **Figure S5. Protein interaction networks of differentially expressed proteins in**  
1070 **H522 cells infected with SARS-CoV-2, related to Figure 6.** Protein complexes of  
1071 differentially expressed H522 and SARS-CoV-2 proteins. Complexes and functions were  
1072 extracted from the CORUM database. The colors correspond to the whole cell proteomic  
1073 clusters identified in 'Fig. 6D'.

1074 **Figure S6. siRNA knockdown efficiency for viral sensing pathways in H522 cells,**  
1075 **related to Figure 7.** qRT-PCR for each gene targeted by siRNA in H522 cells.  
1076 Knockdown efficiency was calculated compared to a non-targeting (NT) control. H522  
1077 cells were infected with SARS-CoV-2 24 hpi and RNA was collected 24, 96, and 120 hpi.  
1078 TLR8 mRNA was not detected across the three time points.

1079 **Table S1. Cell line RNA-seq, related to Figure 1.**

1080 **Table S2. Differentially expressed genes from RNA-seq in H522 cells infected with**  
1081 **SARS-CoV-2, related to Figure 5.**

1082 **Table S3. Gene set enrichment analysis from RNA-seq in H522 cells infected with**  
1083 **SARS-CoV-2, related to Figure 5.**

1084 **Table S4. Protein expression changes from whole cell proteomics in H522 cells**  
1085 **infected with SARS-CoV-2, related to Figure 6.**

1086 **Table S5. Gene set enrichment analysis from whole cell proteomics in H522 cells**  
1087 **infected with SARS-CoV-2, related to Figure 6.**

1088 **Table S6. Oligo sequences, related to STAR methods**

1089

## 1090 REFERENCES

1091

- 1092 Agajanian, M.J., Walker, M.P., Axtman, A.D., Ruela-de-Sousa, R.R., Serafin, D.S.,  
1093 Rabinowitz, A.D., Graham, D.M., Ryan, M.B., Tamir, T., Nakamichi, Y., *et al.* (2019).  
1094 WNT Activates the AAK1 Kinase to Promote Clathrin-Mediated Endocytosis of LRP6  
1095 and Establish a Negative Feedback Loop. *Cell Rep* 26, 79-93 e78.
- 1096 Aguiar, J.A., Tremblay, B.J., Mansfield, M.J., Woody, O., Lobb, B., Banerjee, A.,  
1097 Chandiramohan, A., Tiessen, N., Cao, Q., Dvorkin-Gheva, A., *et al.* (2020). Gene  
1098 expression and in situ protein profiling of candidate SARS-CoV-2 receptors in human  
1099 airway epithelial cells and lung tissue. *Eur Respir J* 56.
- 1100 Alsoussi, W.B., Turner, J.S., Case, J.B., Zhao, H., Schmitz, A.J., Zhou, J.Q., Chen, R.E.,  
1101 Lei, T., Rizk, A.A., McIntire, K.M., *et al.* (2020). A Potently Neutralizing Antibody Protects  
1102 Mice against SARS-CoV-2 Infection. *J Immunol* 205, 915-922.
- 1103 Blanco-Melo, D., Nilsson-Payant, B.E., Liu, W.C., Uhl, S., Hoagland, D., Moller, R.,  
1104 Jordan, T.X., Oishi, K., Panis, M., Sachs, D., *et al.* (2020). Imbalanced Host Response to  
1105 SARS-CoV-2 Drives Development of COVID-19. *Cell* 181, 1036-1045 e1039.
- 1106 Bojkova, D., Klann, K., Koch, B., Widera, M., Krause, D., Ciesek, S., Cinatl, J., and  
1107 Munch, C. (2020). Proteomics of SARS-CoV-2-infected host cells reveals therapy  
1108 targets. *Nature* 583, 469-472.
- 1109 Bouhaddou, M., Memon, D., Meyer, B., White, K.M., Rezelj, V.V., Correa Marrero, M.,  
1110 Polacco, B.J., Melnyk, J.E., Ulferts, S., Kaake, R.M., *et al.* (2020). The Global  
1111 Phosphorylation Landscape of SARS-CoV-2 Infection. *Cell* 182, 685-712 e619.
- 1112 Cagno, V. (2020). SARS-CoV-2 cellular tropism. *Lancet Microbe* 1, e2-e3.
- 1113 Cantuti-Castelvetri, L., Ojha, R., Pedro, L.D., Djannatian, M., Franz, J., Kuivanen, S.,  
1114 van der Meer, F., Kallio, K., Kaya, T., Anastasina, M., *et al.* (2020). Neuropilin-1  
1115 facilitates SARS-CoV-2 cell entry and infectivity. *Science* 370, 856-860.
- 1116 Case, J.B., Rothlauf, P.W., Chen, R.E., Liu, Z., Zhao, H., Kim, A.S., Bloyet, L.M., Zeng,  
1117 Q., Tahan, S., Droit, L., *et al.* (2020). Neutralizing Antibody and Soluble ACE2 Inhibition  
1118 of a Replication-Competent VSV-SARS-CoV-2 and a Clinical Isolate of SARS-CoV-2.  
1119 *Cell Host Microbe* 28, 475-485 e475.

1120 Chen, G., Wu, D., Guo, W., Cao, Y., Huang, D., Wang, H., Wang, T., Zhang, X., Chen,  
1121 H., Yu, H., *et al.* (2020). Clinical and immunological features of severe and moderate  
1122 coronavirus disease 2019. *J Clin Invest* 130, 2620-2629.

1123 Chu, H., Chan, J.F., Wang, Y., Yuen, T.T., Chai, Y., Hou, Y., Shuai, H., Yang, D., Hu, B.,  
1124 Huang, X., *et al.* (2020a). Comparative replication and immune activation profiles of  
1125 SARS-CoV-2 and SARS-CoV in human lungs: an ex vivo study with implications for the  
1126 pathogenesis of COVID-19. *Clin Infect Dis*.

1127 Chu, H., Chan, J.F.-W., Yuen, T.T.-T., Shuai, H., Yuan, S., Wang, Y., Hu, B., Yip, C.C.-  
1128 Y., Tsang, J.O.-L., Huang, X., *et al.* (2020b). Comparative tropism, replication kinetics,  
1129 and cell damage profiling of SARS-CoV-2 and SARS-CoV with implications for clinical  
1130 manifestations, transmissibility, and laboratory studies of COVID-19: an observational  
1131 study. *Lancet Microbe* 1, e14-e23.

1132 Clausen, T.M., Sandoval, D.R., Spliid, C.B., Pihl, J., Perrett, H.R., Painter, C.D.,  
1133 Narayanan, A., Majowicz, S.A., Kwong, E.M., McVicar, R.N., *et al.* (2020). SARS-CoV-2  
1134 Infection Depends on Cellular Heparan Sulfate and ACE2. *Cell* 183, 1043-1057 e1015.

1135 Conner, S.D., and Schmid, S.L. (2002). Identification of an adaptor-associated kinase,  
1136 AAK1, as a regulator of clathrin-mediated endocytosis. *J Cell Biol* 156, 921-929.

1137 Conner, S.D., and Schmid, S.L. (2003). Differential requirements for AP-2 in clathrin-  
1138 mediated endocytosis. *J Cell Biol* 162, 773-779.

1139 Daly, J.L., Simonetti, B., Klein, K., Chen, K.E., Williamson, M.K., Anton-Plagaro, C.,  
1140 Shoemark, D.K., Simon-Gracia, L., Bauer, M., Hollandi, R., *et al.* (2020). Neuropilin-1 is  
1141 a host factor for SARS-CoV-2 infection. *Science* 370, 861-865.

1142 Desmyter, J., Melnick, J.L., and Rawls, W.E. (1968). Defectiveness of interferon  
1143 production and of rubella virus interference in a line of African green monkey kidney cells  
1144 (Vero). *J Virol* 2, 955-961.

1145 Diaz, M.O., Ziemins, S., Le Beau, M.M., Pitha, P., Smith, S.D., Chilcote, R.R., and  
1146 Rowley, J.D. (1988). Homozygous deletion of the alpha- and beta 1-interferon genes in  
1147 human leukemia and derived cell lines. *Proc Natl Acad Sci U S A* 85, 5259-5263.

1148 Espert, L., Degols, G., Gongora, C., Blondel, D., Williams, B.R., Silverman, R.H., and  
1149 Mechti, N. (2003). ISG20, a new interferon-induced RNase specific for single-stranded  
1150 RNA, defines an alternative antiviral pathway against RNA genomic viruses. *J Biol Chem*  
1151 278, 16151-16158.

1152 Fensterl, V., Wetzel, J.L., Ramachandran, S., Ogino, T., Stohlman, S.A., Bergmann,  
1153 C.C., Diamond, M.S., Virgin, H.W., and Sen, G.C. (2012). Interferon-induced Ifit2/ISG54  
1154 protects mice from lethal VSV neuropathogenesis. *PLoS Pathog* 8, e1002712.

1155 Giurgiu, M., Reinhard, J., Brauner, B., Dunger-Kaltenbach, I., Fobo, G., Frishman, G.,  
1156 Montrone, C., and Ruepp, A. (2019). CORUM: the comprehensive resource of  
1157 mammalian protein complexes-2019. *Nucleic Acids Res* 47, D559-D563.

1158 Hamming, I., Timens, W., Bulthuis, M.L., Lely, A.T., Navis, G., and van Goor, H. (2004).  
1159 Tissue distribution of ACE2 protein, the functional receptor for SARS coronavirus. A first  
1160 step in understanding SARS pathogenesis. *J Pathol* 203, 631-637.

1161 Hikmet, F., Mear, L., Edvinsson, A., Micke, P., Uhlen, M., and Lindskog, C. (2020). The  
1162 protein expression profile of ACE2 in human tissues. *Mol Syst Biol* 16, e9610.

1163 Hoffmann, M., Kleine-Weber, H., Schroeder, S., Kruger, N., Herrler, T., Erichsen, S.,  
1164 Schiergens, T.S., Herrler, G., Wu, N.H., Nitsche, A., *et al.* (2020). SARS-CoV-2 Cell  
1165 Entry Depends on ACE2 and TMPRSS2 and Is Blocked by a Clinically Proven Protease  
1166 Inhibitor. *Cell* 181, 271-280 e278.

1167 Horani, A., Druley, T.E., Zariwala, M.A., Patel, A.C., Levinson, B.T., Van Arendonk, L.G.,  
1168 Thornton, K.C., Giacalone, J.C., Albee, A.J., Wilson, K.S., *et al.* (2012). Whole-exome  
1169 capture and sequencing identifies HEATR2 mutation as a cause of primary ciliary  
1170 dyskinesia. *Am J Hum Genet* 91, 685-693.

1171 Horani, A., Nath, A., Wasserman, M.G., Huang, T., and Brody, S.L. (2013). Rho-  
1172 associated protein kinase inhibition enhances airway epithelial Basal-cell proliferation  
1173 and lentivirus transduction. *Am J Respir Cell Mol Biol* 49, 341-347.  
1174 Horani, A., Ustione, A., Huang, T., Firth, A.L., Pan, J., Gunsten, S.P., Haspel, J.A.,  
1175 Piston, D.W., and Brody, S.L. (2018). Establishment of the early cilia preassembly  
1176 protein complex during motile ciliogenesis. *Proc Natl Acad Sci U S A* 115, E1221-E1228.  
1177 Hou, Y.J., Okuda, K., Edwards, C.E., Martinez, D.R., Asakura, T., Dinnon, K.H., 3rd,  
1178 Kato, T., Lee, R.E., Yount, B.L., Mascenik, T.M., *et al.* (2020). SARS-CoV-2 Reverse  
1179 Genetics Reveals a Variable Infection Gradient in the Respiratory Tract. *Cell* 182, 429-  
1180 446 e414.  
1181 Huang, C., Lokugamage, K.G., Rozovics, J.M., Narayanan, K., Semler, B.L., and  
1182 Makino, S. (2011). SARS coronavirus nsp1 protein induces template-dependent  
1183 endonucleolytic cleavage of mRNAs: viral mRNAs are resistant to nsp1-induced RNA  
1184 cleavage. *PLoS Pathog* 7, e1002433.  
1185 Huang, C., Wang, Y., Li, X., Ren, L., Zhao, J., Hu, Y., Zhang, L., Fan, G., Xu, J., Gu, X.,  
1186 *et al.* (2020). Clinical features of patients infected with 2019 novel coronavirus in Wuhan,  
1187 China. *Lancet* 395, 497-506.  
1188 Huang, X., Dong, W., Milewska, A., Golda, A., Qi, Y., Zhu, Q.K., Marasco, W.A., Baric,  
1189 R.S., Sims, A.C., Pyrc, K., *et al.* (2015). Human Coronavirus HKU1 Spike Protein Uses  
1190 O-Acetylated Sialic Acid as an Attachment Receptor Determinant and Employs  
1191 Hemagglutinin-Esterase Protein as a Receptor-Destroying Enzyme. *J Virol* 89, 7202-  
1192 7213.  
1193 Hulswit, R.J.G., Lang, Y., Bakkers, M.J.G., Li, W., Li, Z., Schouten, A., Ophorst, B., van  
1194 Kuppeveld, F.J.M., Boons, G.J., Bosch, B.J., *et al.* (2019). Human coronaviruses OC43  
1195 and HKU1 bind to 9-O-acetylated sialic acids via a conserved receptor-binding site in  
1196 spike protein domain A. *Proc Natl Acad Sci U S A* 116, 2681-2690.  
1197 Jassal, B., Matthews, L., Viteri, G., Gong, C., Lorente, P., Fabregat, A., Sidiropoulos, K.,  
1198 Cook, J., Gillespie, M., Haw, R., *et al.* (2020). The reactome pathway knowledgebase.  
1199 *Nucleic Acids Res* 48, D498-D503.  
1200 Kamitani, W., Huang, C., Narayanan, K., Lokugamage, K.G., and Makino, S. (2009). A  
1201 two-pronged strategy to suppress host protein synthesis by SARS coronavirus Nsp1  
1202 protein. *Nat Struct Mol Biol* 16, 1134-1140.  
1203 Kang, Y.L., Chou, Y.Y., Rothlauf, P.W., Liu, Z., Soh, T.K., Cureton, D., Case, J.B., Chen,  
1204 R.E., Diamond, M.S., Whelan, S.P.J., *et al.* (2020). Inhibition of PIKfyve kinase prevents  
1205 infection by Zaire ebolavirus and SARS-CoV-2. *Proc Natl Acad Sci U S A* 117, 20803-  
1206 20813.  
1207 Kim, J.M., Chung, Y.S., Jo, H.J., Lee, N.J., Kim, M.S., Woo, S.H., Park, S., Kim, J.W.,  
1208 Kim, H.M., and Han, M.G. (2020). Identification of Coronavirus Isolated from a Patient in  
1209 Korea with COVID-19. *Osong Public Health Res Perspect* 11, 3-7.  
1210 Kopecky-Bromberg, S.A., Martinez-Sobrido, L., and Palese, P. (2006). 7a protein of  
1211 severe acute respiratory syndrome coronavirus inhibits cellular protein synthesis and  
1212 activates p38 mitogen-activated protein kinase. *J Virol* 80, 785-793.  
1213 Lazear, H.M., Schoggins, J.W., and Diamond, M.S. (2019). Shared and Distinct  
1214 Functions of Type I and Type III Interferons. *Immunity* 50, 907-923.  
1215 Letko, M., Marzi, A., and Munster, V. (2020). Functional assessment of cell entry and  
1216 receptor usage for SARS-CoV-2 and other lineage B betacoronaviruses. *Nat Microbiol* 5,  
1217 562-569.  
1218 Li, W., Hulswit, R.J.G., Widjaja, I., Raj, V.S., McBride, R., Peng, W., Widagdo, W.,  
1219 Tortorici, M.A., van Dieren, B., Lang, Y., *et al.* (2017). Identification of sialic acid-binding  
1220 function for the Middle East respiratory syndrome coronavirus spike glycoprotein. *Proc*  
1221 *Natl Acad Sci U S A* 114, E8508-E8517.

- 1222 Liberzon, A., Birger, C., Thorvaldsdottir, H., Ghandi, M., Mesirov, J.P., and Tamayo, P.  
1223 (2015). The Molecular Signatures Database (MSigDB) hallmark gene set collection. *Cell*  
1224 *Syst 1*, 417-425.
- 1225 Liberzon, A., Subramanian, A., Pinchback, R., Thorvaldsdottir, H., Tamayo, P., and  
1226 Mesirov, J.P. (2011). Molecular signatures database (MSigDB) 3.0. *Bioinformatics 27*,  
1227 1739-1740.
- 1228 Liu, C., Tang, J., Ma, Y., Liang, X., Yang, Y., Peng, G., Qi, Q., Jiang, S., Li, J., Du, L., *et*  
1229 *al.* (2015). Receptor usage and cell entry of porcine epidemic diarrhea coronavirus. *J*  
1230 *Virology 89*, 6121-6125.
- 1231 Liu, S.Y., Sanchez, D.J., Aliyari, R., Lu, S., and Cheng, G. (2012). Systematic  
1232 identification of type I and type II interferon-induced antiviral factors. *Proc Natl Acad Sci*  
1233 *U S A 109*, 4239-4244.
- 1234 Lokugamage, K.G., Hage, A., de Vries, M., Valero-Jimenez, A.M., Schindewolf, C.,  
1235 Dittmann, M., Rajsbaum, R., and Menachery, V.D. (2020). Type I Interferon  
1236 Susceptibility Distinguishes SARS-CoV-2 from SARS-CoV. *J Virol 94*.
- 1237 Lokugamage, K.G., Narayanan, K., Huang, C., and Makino, S. (2012). Severe acute  
1238 respiratory syndrome coronavirus protein nsp1 is a novel eukaryotic translation inhibitor  
1239 that represses multiple steps of translation initiation. *J Virol 86*, 13598-13608.
- 1240 Long, J.S., Mistry, B., Haslam, S.M., and Barclay, W.S. (2019). Host and viral  
1241 determinants of influenza A virus species specificity. *Nat Rev Microbiol 17*, 67-81.
- 1242 Malim, M.H., and Bieniasz, P.D. (2012). HIV Restriction Factors and Mechanisms of  
1243 Evasion. *Cold Spring Harb Perspect Med 2*, a006940.
- 1244 Masters, P.S. (2006). The molecular biology of coronaviruses. *Adv Virus Res 66*, 193-  
1245 292.
- 1246 Mertins, P., Tang, L.C., Krug, K., Clark, D.J., Gritsenko, M.A., Chen, L., Clauser, K.R.,  
1247 Clauss, T.R., Shah, P., Gillette, M.A., *et al.* (2018). Reproducible workflow for  
1248 multiplexed deep-scale proteome and phosphoproteome analysis of tumor tissues by  
1249 liquid chromatography-mass spectrometry. *Nat Protoc 13*, 1632-1661.
- 1250 Mick, E., Kamm, J., Pisco, A.O., Ratnasiri, K., Babik, J.M., Castaneda, G., DeRisi, J.L.,  
1251 Detweiler, A.M., Hao, S.L., Kangelaris, K.N., *et al.* (2020). Upper airway gene expression  
1252 reveals suppressed immune responses to SARS-CoV-2 compared with other respiratory  
1253 viruses. *Nat Commun 11*, 5854.
- 1254 Muller, U., Steinhoff, U., Reis, L.F., Hemmi, S., Pavlovic, J., Zinkernagel, R.M., and  
1255 Aguet, M. (1994). Functional role of type I and type II interferons in antiviral defense.  
1256 *Science 264*, 1918-1921.
- 1257 Nakagawa, K., Lokugamage, K.G., and Makino, S. (2016). Viral and Cellular mRNA  
1258 Translation in Coronavirus-Infected Cells. *Adv Virus Res 96*, 165-192.
- 1259 Narayanan, K., Huang, C., Lokugamage, K., Kamitani, W., Ikegami, T., Tseng, C.T., and  
1260 Makino, S. (2008). Severe acute respiratory syndrome coronavirus nsp1 suppresses  
1261 host gene expression, including that of type I interferon, in infected cells. *J Virol 82*,  
1262 4471-4479.
- 1263 Ochsner, S.A., Pillich, R.T., and McKenna, N.J. (2020). Consensus transcriptional  
1264 regulatory networks of coronavirus-infected human cells. *Sci Data 7*, 314.
- 1265 Osada, N., Kohara, A., Yamaji, T., Hirayama, N., Kasai, F., Sekizuka, T., Kuroda, M.,  
1266 and Hanada, K. (2014). The genome landscape of the african green monkey kidney-  
1267 derived vero cell line. *DNA Res 21*, 673-683.
- 1268 Ou, X., Liu, Y., Lei, X., Li, P., Mi, D., Ren, L., Guo, L., Guo, R., Chen, T., Hu, J., *et al.*  
1269 (2020). Characterization of spike glycoprotein of SARS-CoV-2 on virus entry and its  
1270 immune cross-reactivity with SARS-CoV. *Nat Commun 11*, 1620.
- 1271 Oughtred, R., Rust, J., Chang, C., Breitkreutz, B.J., Stark, C., Willems, A., Boucher, L.,  
1272 Leung, G., Kolas, N., Zhang, F., *et al.* (2021). The BioGRID database: A comprehensive



1273 biomedical resource of curated protein, genetic, and chemical interactions. *Protein Sci*  
1274 *30*, 187-200.

1275 Park, A., and Iwasaki, A. (2020). Type I and Type III Interferons - Induction, Signaling,  
1276 Evasion, and Application to Combat COVID-19. *Cell Host Microbe* *27*, 870-878.

1277 Park, Y.J., Walls, A.C., Wang, Z., Sauer, M.M., Li, W., Tortorici, M.A., Bosch, B.J.,  
1278 DiMaio, F., and Veessler, D. (2019). Structures of MERS-CoV spike glycoprotein in  
1279 complex with sialoside attachment receptors. *Nat Struct Mol Biol* *26*, 1151-1157.

1280 Patro, R., Duggal, G., Love, M.I., Irizarry, R.A., and Kingsford, C. (2017). Salmon  
1281 provides fast and bias-aware quantification of transcript expression. *Nat Methods* *14*,  
1282 417-419.

1283 Pavlovic, J., Zurcher, T., Haller, O., and Staeheli, P. (1990). Resistance to influenza  
1284 virus and vesicular stomatitis virus conferred by expression of human MxA protein. *J*  
1285 *Virol* *64*, 3370-3375.

1286 Puray-Chavez, M., Tedbury, P.R., Huber, A.D., Ukah, O.B., Yapo, V., Liu, D., Ji, J., Wolf,  
1287 J.J., Engelman, A.N., and Sarafianos, S.G. (2017). Multiplex single-cell visualization of  
1288 nucleic acids and protein during HIV infection. *Nat Commun* *8*, 1882.

1289 Qi, F., Qian, S., Zhang, S., and Zhang, Z. (2020). Single cell RNA sequencing of 13  
1290 human tissues identify cell types and receptors of human coronaviruses. *Biochem*  
1291 *Biophys Res Commun* *526*, 135-140.

1292 Richardson, P., Griffin, I., Tucker, C., Smith, D., Oechsle, O., Phelan, A., Rawling, M.,  
1293 Savory, E., and Stebbing, J. (2020). Baricitinib as potential treatment for 2019-nCoV  
1294 acute respiratory disease. *Lancet* *395*, e30-e31.

1295 Rihn, S.J., Aziz, M.A., Stewart, D.G., Hughes, J., Turnbull, M.L., Varela, M., Sugrue, E.,  
1296 Herd, C.S., Stanifer, M., Sinkins, S.P., *et al.* (2019). TRIM69 Inhibits Vesicular Stomatitis  
1297 Indiana Virus. *J Virol* *93*.

1298 Ritchie, M.E., Phipson, B., Wu, D., Hu, Y., Law, C.W., Shi, W., and Smyth, G.K. (2015).  
1299 limma powers differential expression analyses for RNA-sequencing and microarray  
1300 studies. *Nucleic Acids Res* *43*, e47.

1301 Robinson, M.D., McCarthy, D.J., and Smyth, G.K. (2010). edgeR: a Bioconductor  
1302 package for differential expression analysis of digital gene expression data.  
1303 *Bioinformatics* *26*, 139-140.

1304 Rothenburg, S., and Brennan, G. (2020). Species-Specific Host-Virus Interactions:  
1305 Implications for Viral Host Range and Virulence. *Trends Microbiol* *28*, 46-56.

1306 Rubinstein, S., Familletti, P.C., and Pestka, S. (1981). Convenient assay for interferons.  
1307 *J Virol* *37*, 755-758.

1308 Schaefer, I.M., Padera, R.F., Solomon, I.H., Kanjilal, S., Hammer, M.M., Hornick, J.L.,  
1309 and Sholl, L.M. (2020). In situ detection of SARS-CoV-2 in lungs and airways of patients  
1310 with COVID-19. *Mod Pathol* *33*, 2104-2114.

1311 Schoeman, D., and Fielding, B.C. (2019). Coronavirus envelope protein: current  
1312 knowledge. *Virol J* *16*, 69.

1313 Schoggins, J.W. (2018). Recent advances in antiviral interferon-stimulated gene biology.  
1314 *F1000Res* *7*, 309.

1315 Schubert, K., Karousis, E.D., Jomaa, A., Scaiola, A., Echeverria, B., Gurzeler, L.A.,  
1316 Leibundgut, M., Thiel, V., Muhlemann, O., and Ban, N. (2020). SARS-CoV-2 Nsp1 binds  
1317 the ribosomal mRNA channel to inhibit translation. *Nat Struct Mol Biol* *27*, 959-966.

1318 Schultze, B., Krempf, C., Ballesteros, M.L., Shaw, L., Schauer, R., Enjuanes, L., and  
1319 Herrler, G. (1996). Transmissible gastroenteritis coronavirus, but not the related porcine  
1320 respiratory coronavirus, has a sialic acid (N-glycolylneuraminic acid) binding activity. *J*  
1321 *Virol* *70*, 5634-5637.

1322 Shajahan, A., Archer-Hartmann, S., Supekar, N.T., Gleinich, A.S., Heiss, C., and Azadi,  
1323 P. (2020). Comprehensive characterization of N- and O- glycosylation of SARS-CoV-2  
1324 human receptor angiotensin converting enzyme 2. *Glycobiology*.  
1325 Shang, J., Wan, Y., Luo, C., Ye, G., Geng, Q., Auerbach, A., and Li, F. (2020). Cell entry  
1326 mechanisms of SARS-CoV-2. *Proc Natl Acad Sci U S A* *117*, 11727-11734.  
1327 Shema Mugisha, C., Vuong, H.R., Puray-Chavez, M., Bailey, A.L., Fox, J.M., Chen,  
1328 R.E., Wessel, A.W., Scott, J.M., Harastani, H.H., Boon, A.C.M., *et al.* (2020a). A  
1329 Simplified Quantitative Real-Time PCR Assay for Monitoring SARS-CoV-2 Growth in  
1330 Cell Culture. *mSphere* *5*.  
1331 Shema Mugisha, C., Vuong, H.R., Puray-Chavez, M., and Kutluay, S.B. (2020b). A facile  
1332 Q-RT-PCR assay for monitoring SARS-CoV-2 growth in cell culture. *bioRxiv*.  
1333 Soneson, C., Love, M.I., and Robinson, M.D. (2015). Differential analyses for RNA-seq:  
1334 transcript-level estimates improve gene-level inferences. *F1000Res* *4*, 1521.  
1335 Stukalov, A., Girault, V., Grass, V., Bergant, V., Karayel, O., Urban, C., Haas, D.A.,  
1336 Huang, Y., Oubraham, L., Wang, A., *et al.* (2020). Multi-level proteomics reveals host-  
1337 perturbation strategies of SARS-CoV-2 and SARS-CoV. *bioRxiv*,  
1338 2020.2006.2017.156455.  
1339 Sungnak, W., Huang, N., Becavin, C., Berg, M., Queen, R., Litvinukova, M., Talavera-  
1340 Lopez, C., Maatz, H., Reichart, D., Sampaziotis, F., *et al.* (2020). SARS-CoV-2 entry  
1341 factors are highly expressed in nasal epithelial cells together with innate immune genes.  
1342 *Nat Med* *26*, 681-687.  
1343 To, K.F., and Lo, A.W. (2004). Exploring the pathogenesis of severe acute respiratory  
1344 syndrome (SARS): the tissue distribution of the coronavirus (SARS-CoV) and its putative  
1345 receptor, angiotensin-converting enzyme 2 (ACE2). *J Pathol* *203*, 740-743.  
1346 Tortorici, M.A., Walls, A.C., Lang, Y., Wang, C., Li, Z., Koerhuis, D., Boons, G.J., Bosch,  
1347 B.J., Rey, F.A., de Groot, R.J., *et al.* (2019). Structural basis for human coronavirus  
1348 attachment to sialic acid receptors. *Nat Struct Mol Biol* *26*, 481-489.  
1349 Tyanova, S., Temu, T., and Cox, J. (2016). The MaxQuant computational platform for  
1350 mass spectrometry-based shotgun proteomics. *Nat Protoc* *11*, 2301-2319.  
1351 UniProt, C. (2019). UniProt: a worldwide hub of protein knowledge. *Nucleic Acids Res*  
1352 *47*, D506-D515.  
1353 Varga, Z., Flammer, A.J., Steiger, P., Haberecker, M., Andermatt, R., Zinkernagel, A.S.,  
1354 Mehra, M.R., Schuepbach, R.A., Ruschitzka, F., and Moch, H. (2020). Endothelial cell  
1355 infection and endotheliitis in COVID-19. *Lancet* *395*, 1417-1418.  
1356 Vlasak, R., Luytjes, W., Spaan, W., and Palese, P. (1988). Human and bovine  
1357 coronaviruses recognize sialic acid-containing receptors similar to those of influenza C  
1358 viruses. *Proc Natl Acad Sci U S A* *85*, 4526-4529.  
1359 Walls, A.C., Park, Y.J., Tortorici, M.A., Wall, A., McGuire, A.T., and Veesler, D. (2020).  
1360 Structure, Function, and Antigenicity of the SARS-CoV-2 Spike Glycoprotein. *Cell* *181*,  
1361 281-292 e286.  
1362 Wang, S., Qiu, Z., Hou, Y., Deng, X., Xu, W., Zheng, T., Wu, P., Xie, S., Bian, W.,  
1363 Zhang, C., *et al.* (2021). AXL is a candidate receptor for SARS-CoV-2 that promotes  
1364 infection of pulmonary and bronchial epithelial cells. *Cell Res*.  
1365 Wickramasinghe, I.N., de Vries, R.P., Grone, A., de Haan, C.A., and Verheije, M.H.  
1366 (2011). Binding of avian coronavirus spike proteins to host factors reflects virus tropism  
1367 and pathogenicity. *J Virol* *85*, 8903-8912.  
1368 Wilkerson, M.D., and Hayes, D.N. (2010). ConsensusClusterPlus: a class discovery tool  
1369 with confidence assessments and item tracking. *Bioinformatics* *26*, 1572-1573.  
1370 Wrapp, D., Wang, N., Corbett, K.S., Goldsmith, J.A., Hsieh, C.L., Abiona, O., Graham,  
1371 B.S., and McLellan, J.S. (2020). Cryo-EM structure of the 2019-nCoV spike in the  
1372 prefusion conformation. *Science* *367*, 1260-1263.

1373 Wu, F., Zhao, S., Yu, B., Chen, Y.M., Wang, W., Song, Z.G., Hu, Y., Tao, Z.W., Tian,  
1374 J.H., Pei, Y.Y., *et al.* (2020). A new coronavirus associated with human respiratory  
1375 disease in China. *Nature* 579, 265-269.  
1376 Wu, Z., and McGoogan, J.M. (2020). Characteristics of and Important Lessons From the  
1377 Coronavirus Disease 2019 (COVID-19) Outbreak in China: Summary of a Report of  
1378 72314 Cases From the Chinese Center for Disease Control and Prevention. *JAMA*.  
1379 Xia, H., Cao, Z., Xie, X., Zhang, X., Chen, J.Y., Wang, H., Menachery, V.D., Rajsbaum,  
1380 R., and Shi, P.Y. (2020). Evasion of Type I Interferon by SARS-CoV-2. *Cell Rep* 33,  
1381 108234.  
1382 Xiao, H., Xu, L.H., Yamada, Y., and Liu, D.X. (2008). Coronavirus spike protein inhibits  
1383 host cell translation by interaction with eIF3f. *PLoS One* 3, e1494.  
1384 Xie, X., Muruato, A., Lokugamage, K.G., Narayanan, K., Zhang, X., Zou, J., Liu, J.,  
1385 Schindewolf, C., Bopp, N.E., Aguilar, P.V., *et al.* (2020). An Infectious cDNA Clone of  
1386 SARS-CoV-2. *Cell Host Microbe* 27, 841-848 e843.  
1387 Yang, Q., Hughes, T.A., Kelkar, A., Yu, X., Cheng, K., Park, S., Huang, W.C., Lovell,  
1388 J.F., and Neelamegham, S. (2020). Inhibition of SARS-CoV-2 viral entry upon blocking  
1389 N- and O-glycan elaboration. *Elife* 9.  
1390 Yin, X., Riva, L., Pu, Y., Martin-Sancho, L., Kanamune, J., Yamamoto, Y., Sakai, K.,  
1391 Gotoh, S., Miorin, L., De Jesus, P.D., *et al.* (2021). MDA5 Governs the Innate Immune  
1392 Response to SARS-CoV-2 in Lung Epithelial Cells. *Cell Rep* 34, 108628.  
1393 You, Y., Richer, E.J., Huang, T., and Brody, S.L. (2002). Growth and differentiation of  
1394 mouse tracheal epithelial cells: selection of a proliferative population. *Am J Physiol Lung*  
1395 *Cell Mol Physiol* 283, L1315-1321.  
1396 Yu, G., Wang, L.G., Han, Y., and He, Q.Y. (2012). clusterProfiler: an R package for  
1397 comparing biological themes among gene clusters. *OMICS* 16, 284-287.  
1398 Yuan, S., Peng, L., Park, J.J., Hu, Y., Devarkar, S.C., Dong, M.B., Shen, Q., Wu, S.,  
1399 Chen, S., Lomakin, I.B., *et al.* (2020). Nonstructural Protein 1 of SARS-CoV-2 Is a  
1400 Potent Pathogenicity Factor Redirecting Host Protein Synthesis Machinery toward Viral  
1401 RNA. *Mol Cell*.  
1402 Zecha, J., Lee, C.Y., Bayer, F.P., Meng, C., Grass, V., Zerweck, J., Schnatbaum, K.,  
1403 Michler, T., Pichlmair, A., Ludwig, C., *et al.* (2020). Data, Reagents, Assays and Merits  
1404 of Proteomics for SARS-CoV-2 Research and Testing. *Mol Cell Proteomics* 19, 1503-  
1405 1522.  
1406 Zhao, Y., Zhao, Z., Wang, Y., Zhou, Y., Ma, Y., and Zuo, W. (2020). Single-cell RNA  
1407 Expression Profiling of ACE2, The Receptor of SARS-CoV-2. *Am J Respir Crit Care*  
1408 *Med*.  
1409 Zhou, B., Liu, J., Wang, Q., Liu, X., Li, X., Li, P., Ma, Q., and Cao, C. (2008). The  
1410 nucleocapsid protein of severe acute respiratory syndrome coronavirus inhibits cell  
1411 cytokinesis and proliferation by interacting with translation elongation factor 1alpha. *J*  
1412 *Virology* 82, 6962-6971.  
1413 Zhou, P., Yang, X.L., Wang, X.G., Hu, B., Zhang, L., Zhang, W., Si, H.R., Zhu, Y., Li, B.,  
1414 Huang, C.L., *et al.* (2020). A pneumonia outbreak associated with a new coronavirus of  
1415 probable bat origin. *Nature* 579, 270-273.  
1416 Zou, X., Chen, K., Zou, J., Han, P., Hao, J., and Han, Z. (2020). Single-cell RNA-seq  
1417 data analysis on the receptor ACE2 expression reveals the potential risk of different  
1418 human organs vulnerable to 2019-nCoV infection. *Front Med* 14, 185-192.  
1419 Zurcher, T., Pavlovic, J., and Staeheli, P. (1992). Mouse Mx2 protein inhibits vesicular  
1420 stomatitis virus but not influenza virus. *Virology* 187, 796-800.  
1421

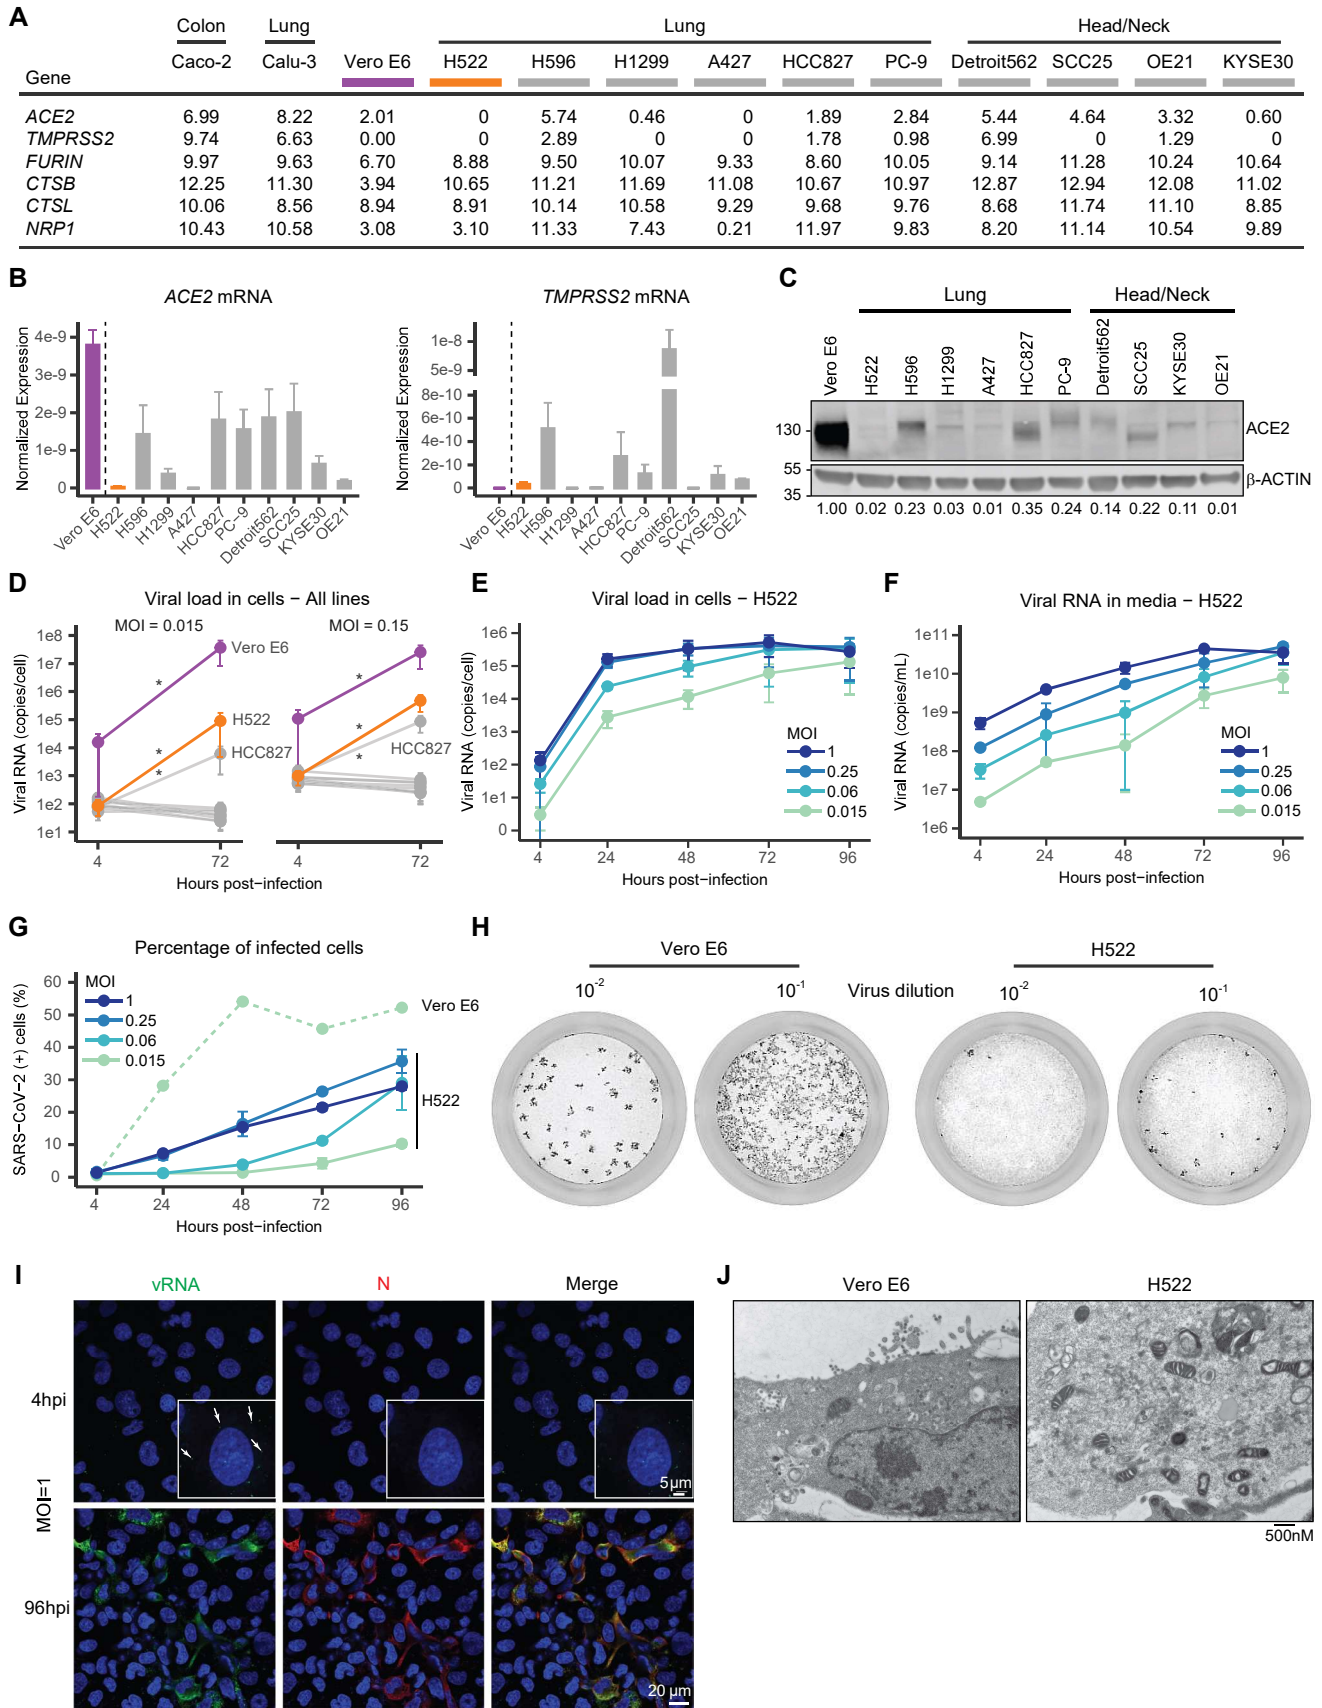

Figure 1



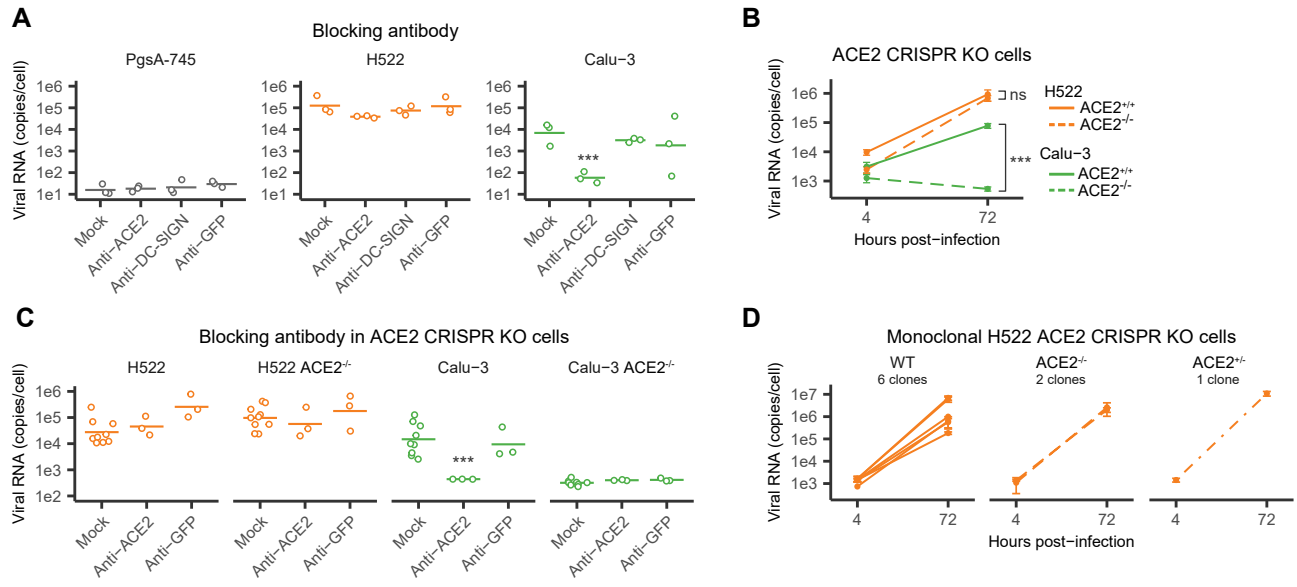

Figure 3

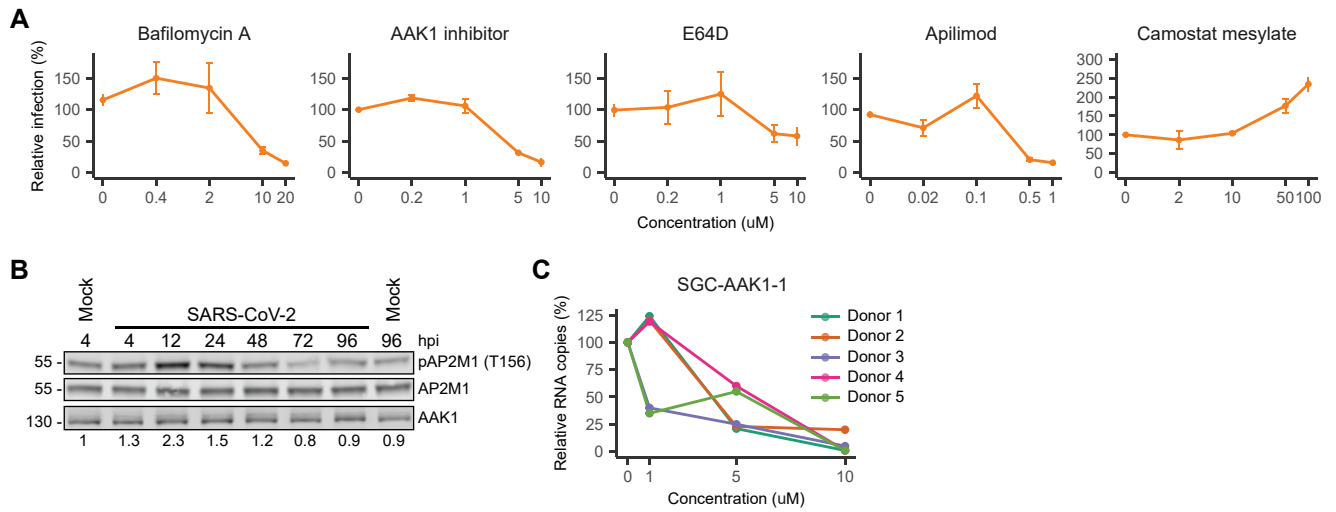

Figure 4

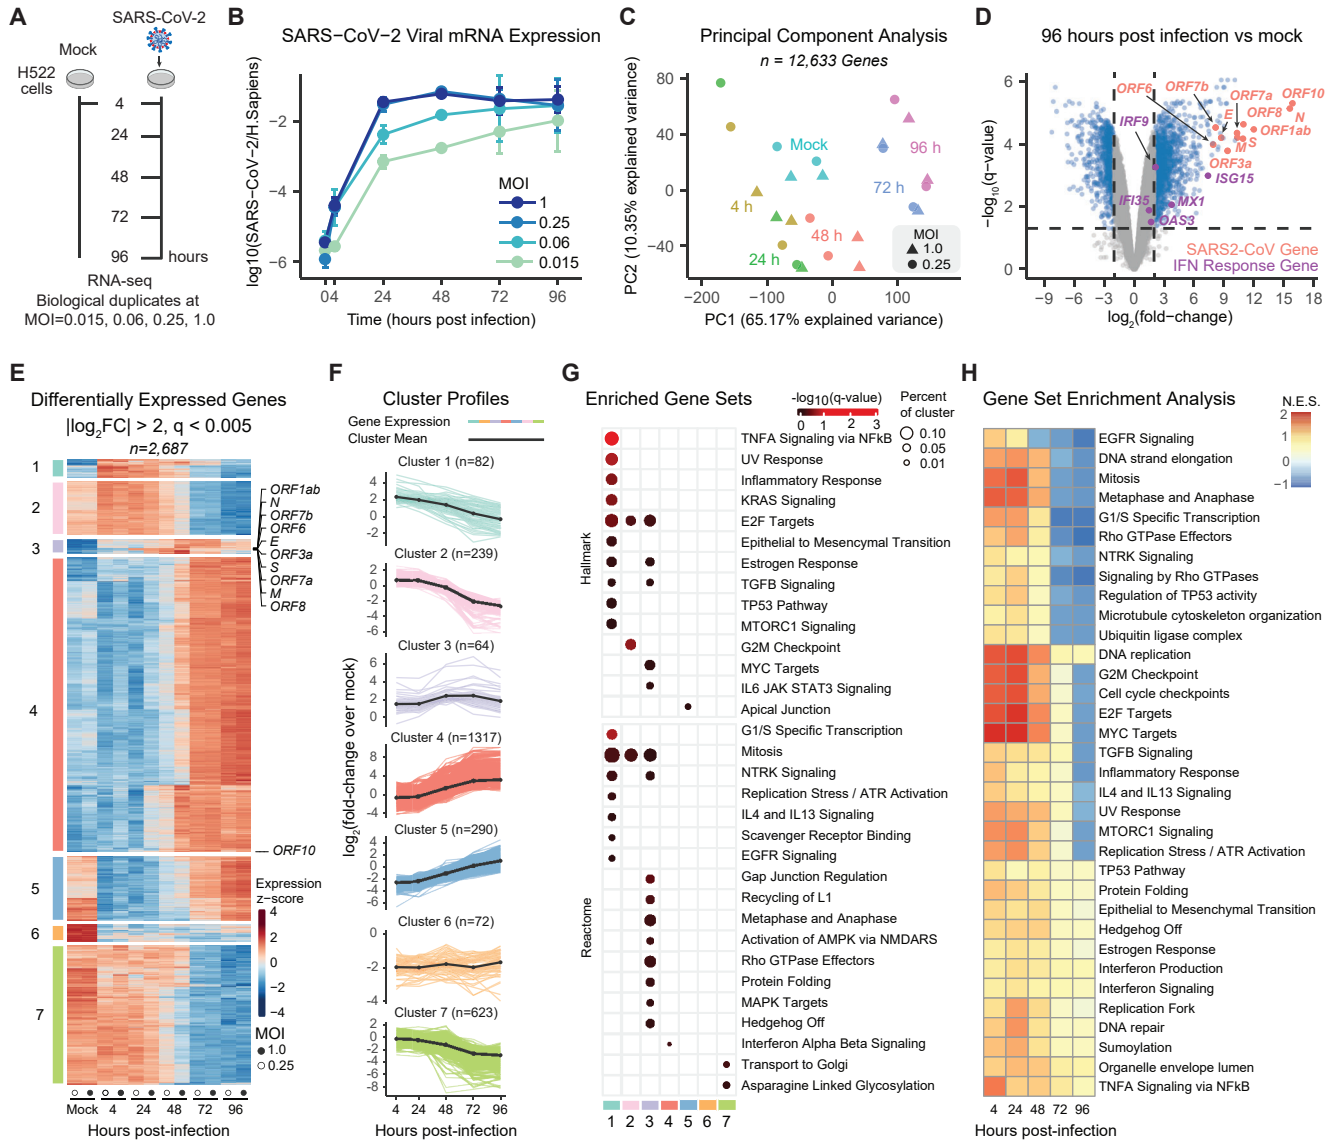

Figure 5



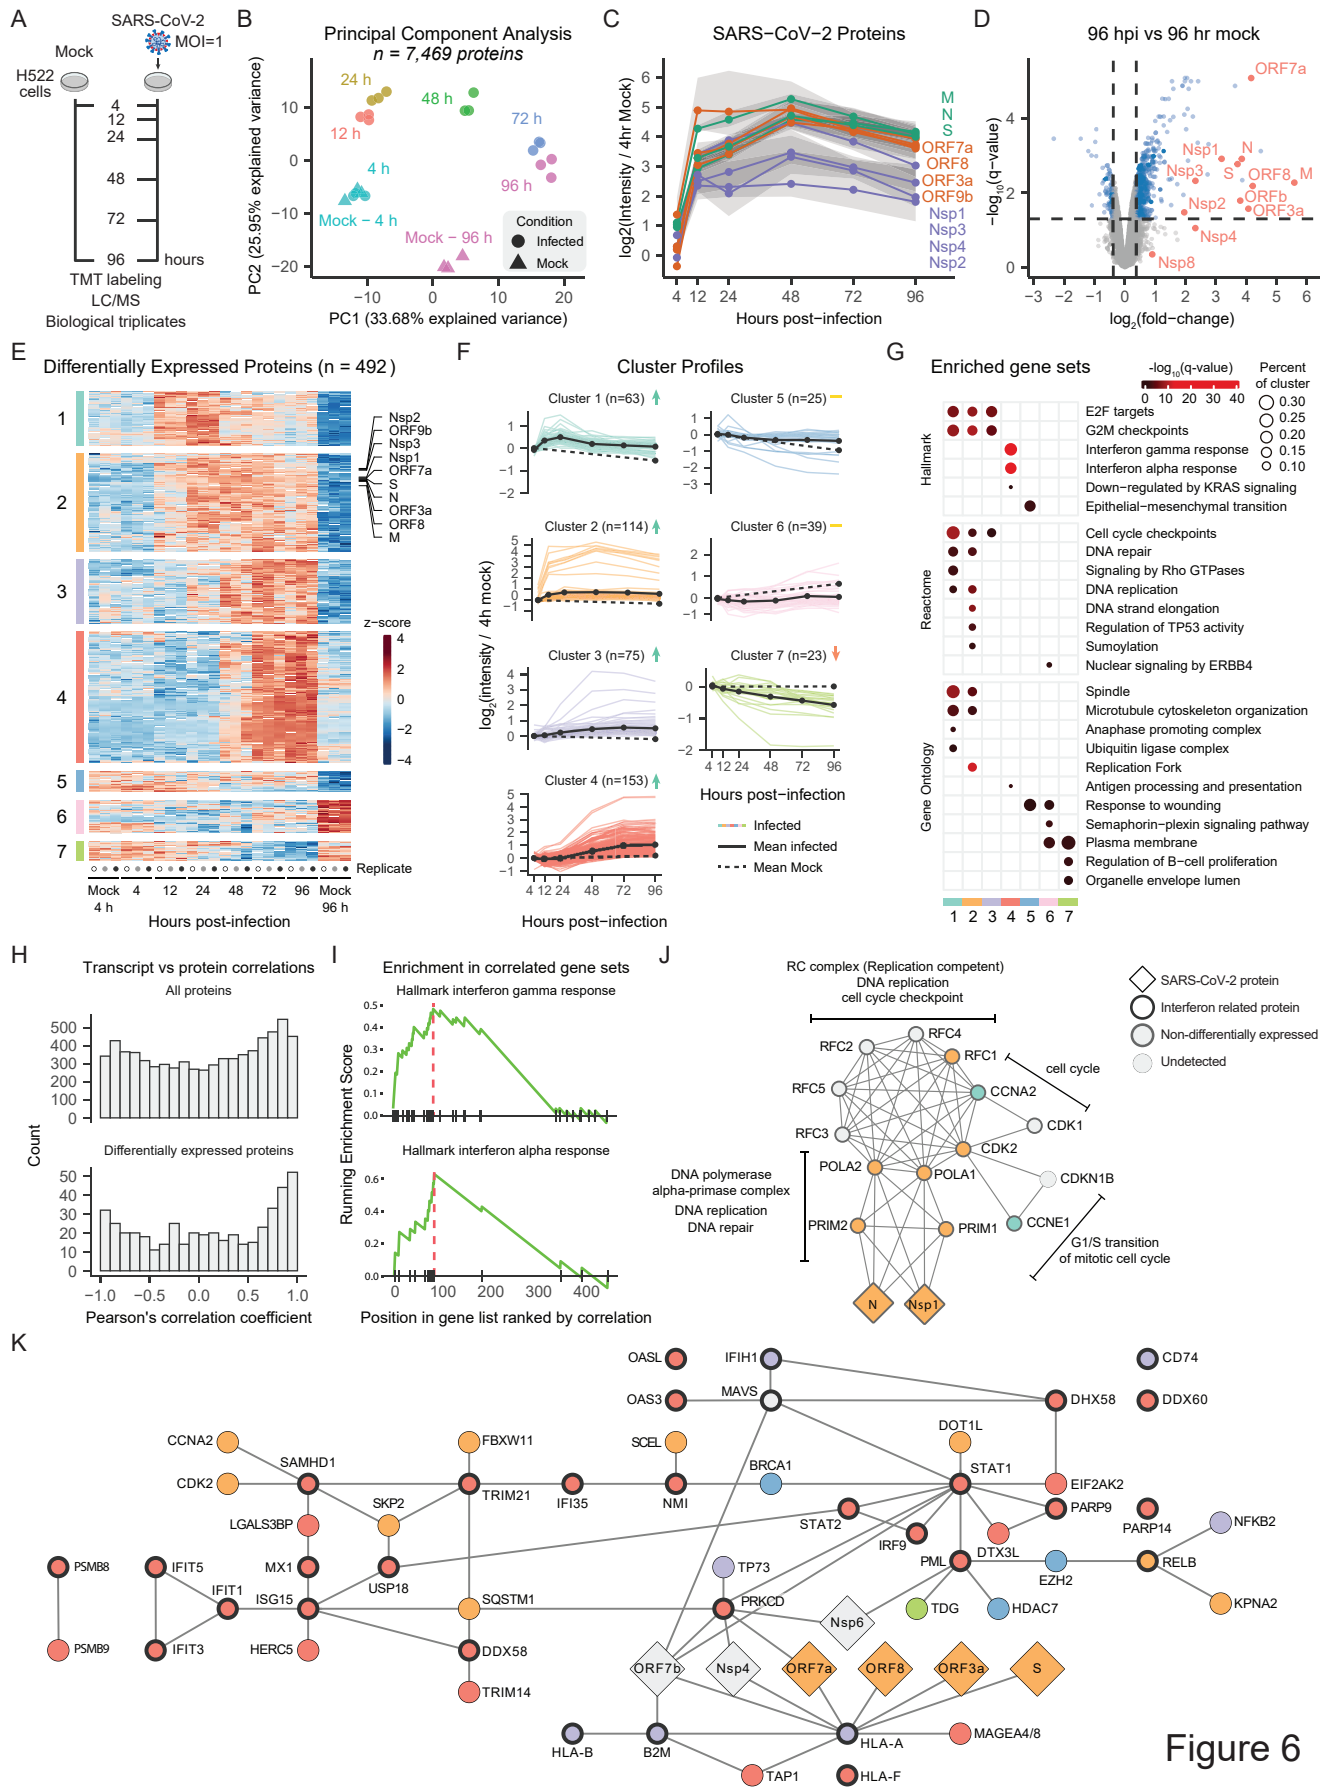

Figure 6

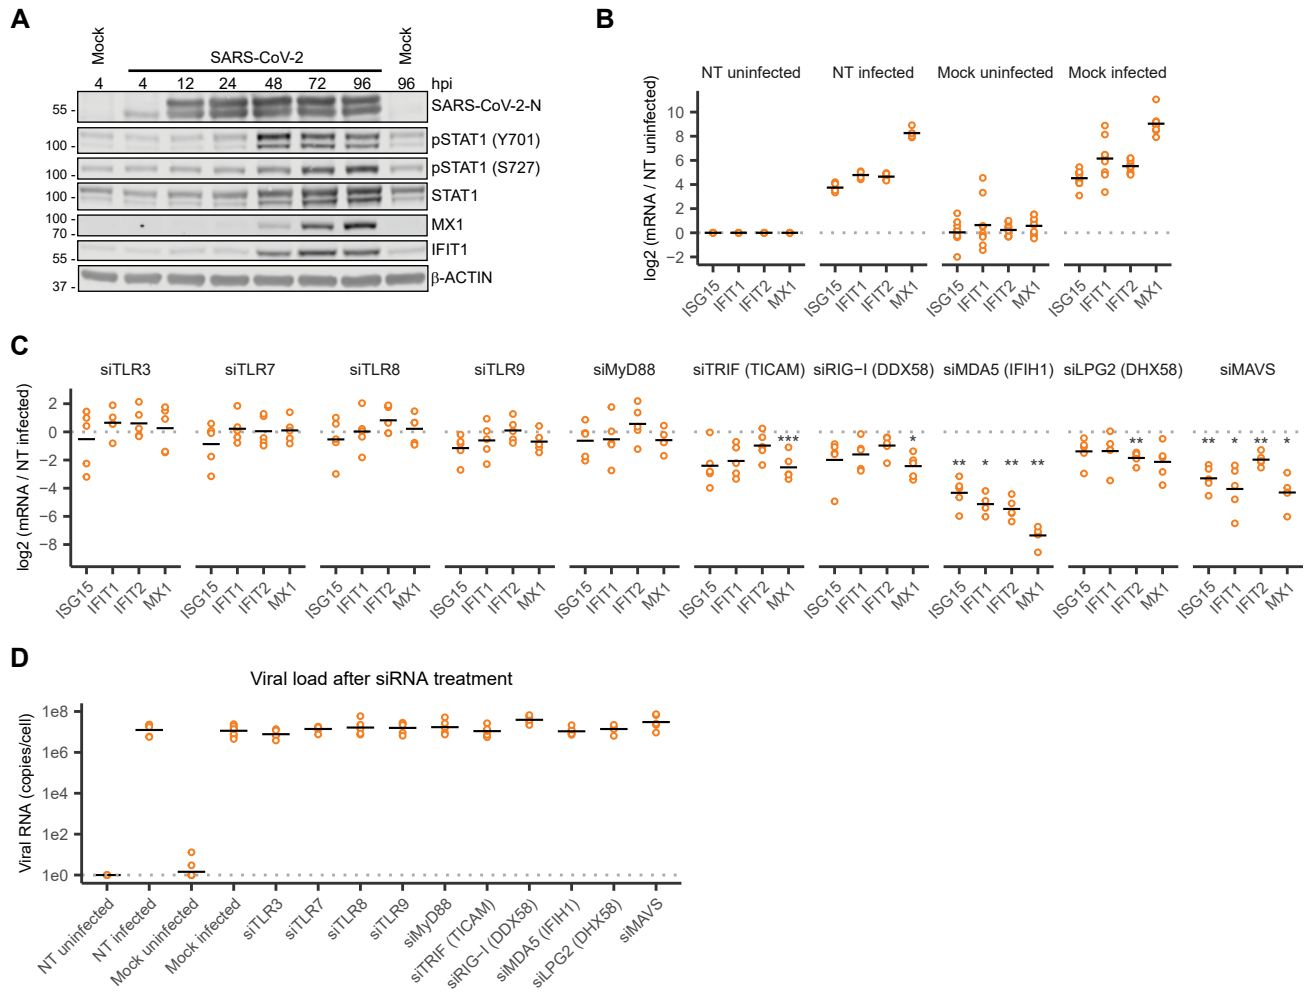

Source: http://biorxiv.org/content/10.1101/2021.03.01.433431v1.full.pdf
